# Neonatal brain dynamic functional connectivity: impact of preterm birth and association with early childhood neurodevelopment

Lucas G. S. França<sup>1,2</sup>, Judit Ciarrusta<sup>1,2</sup>, Oliver Gale-Grant<sup>1,2</sup>, Sunniva Fenn-Moltu<sup>1,2</sup>, Sean Fitzgibbon<sup>3</sup>, Andrew Chew<sup>2</sup>, Shona Falconer<sup>2</sup>, Ralica Dimitrova<sup>1,2</sup>, Lucilio Cordero-Grande<sup>2,4,5</sup>, Anthony N Price<sup>2</sup>, Emer Hughes<sup>2</sup>, Jonathan O'Muircheartaigh<sup>1,2,6</sup>, Eugene Duff<sup>3</sup>, Jetro J Tuulari<sup>7,8,9</sup>, Gustavo Deco<sup>10,11,12,13</sup>, Serena J Counsell<sup>2</sup>, Joseph V Hajnal<sup>2</sup>, Chiara Nosarti<sup>2,14</sup>, Tomoki Arichi<sup>2,6,15,16</sup>, A David Edwards<sup>2,6†</sup>, Grainne McAlonan<sup>1†</sup>, Dafnis Batalle<sup>1,2\*†</sup>

1) Department of Forensic and Neurodevelopmental Science, Institute of Psychiatry, Psychology & Neuroscience, King's College London, London SE5 8AF, United Kingdom

2) Centre for the Developing Brain, School of Biomedical Engineering & Imaging Sciences, King's College London, London SE1 7EH, United Kingdom

3) Oxford Centre for Functional Magnetic Resonance Imaging of the Brain, Wellcome Centre for Integrative Neuroimaging, University of Oxford, Oxford OX3 9DU, United Kingdom

4) Biomedical Image Technologies, Higher Technical School of Engineers in Telecommunication, Polytechnic University of Madrid, 28040 Madrid, Spain

5) Center for Biomedical Research Network – Bioengineering, Biomaterials and Nanomedicine, Carlos III Health Institute, 28029 Madrid, Spain

6) MRC Centre for Neurodevelopmental Disorders, King's College London, London SE1 1UL, United Kingdom

7) FinnBrain Birth Cohort Study, Turku Brain and Mind Center, Institute of Clinical Medicine, University of Turku, 20500 Turku, Finland

8) Turku Collegium for Science and Medicine and Technology, University of Turku, 20500 Turku, Finland

9) Department of Psychiatry, University of Turku and Turku University Hospital, 20500 Turku, Finland

10) Center for Brain and Cognition, Computational Neuroscience Group, Department of Information and Communication Technologies, Pompeu Fabra University, 08002, Barcelona, Spain

11) Catalan Institution for Research and Advanced Studies, 08010 Barcelona, Spain

12) Department of Neuropsychology, Max Planck Institute for Human Cognitive and Brain Sciences, 04103 Leipzig, Germany

13) School of Psychological Sciences, Monash University, Melbourne VIC 3010, Australia

14) Department of Child and Adolescent Psychiatry, Institute of Psychiatry, Psychology & Neuroscience, King's College London, London SE5 8AF, United Kingdom

15) Department of Paediatric Neurosciences, Evelina London Children's Hospital, Guy's and St Thomas' NHS Foundation Trust, London SE1 7EH, United Kingdom

16) Department of Bioengineering, Imperial College London, London SW7 2AZ, United Kingdom

## †Joint senior authors

### \*Corresponding author:

Dafnis Batalle

Main IoPPN Building, Office E1.22

16, De Crespigny Park, SE5 8AF, London, UK

dafnis.batalle@kcl.ac.uk

**Running title:** Neonatal dynamic functional connectivity

## Abstract

Brain functional dynamics have been linked to emotion and cognition in mature individuals, where alterations are associated with mental ill-health and neurodevelopmental conditions (such as autism spectrum disorder). Although reliable resting-state networks have been consistently identified in neonates, little is known about the early development of dynamic brain functional connectivity and whether it is linked to later neurodevelopmental outcomes in childhood. In this study we characterised dynamic functional connectivity in the first few weeks of postnatal life and evaluated whether early dynamic functional connectivity: i) changes with age in the neonatal period ii) is altered by preterm birth and iii) is associated with neurodevelopmental and behavioural outcomes at 18 months.

Global brain dynamics in preterm-born infants were atypical when compared with term-born controls, and associated with atypical social, sensory, and repetitive behaviours measured by the Quantitative Checklist for Autism in Toddlers (Q-CHAT) scores at 18 months of age. On a modular scale, we identified six transient states of neonatal dynamic functional connectivity: three whole-brain synchronisation states and three regional synchrony states occupying occipital, sensory-motor, and frontal regions. Modular characteristics of these brain states were correlated with postmenstrual age and postnatal days at scan. Preterm-born infants had increased occurrence of frontal and occipital states. Higher neonatal sensory-motor synchronisation was associated with lower motor and language outcome scores at 18 months. Lower frequency of occurrence of whole-brain synchronisation states and higher frequency of occurrence of the sensory-motor state were associated with higher Q-CHAT scores at 18 months.

Overall, we show that a dynamic landscape of brain connectivity is already established by the time of birth in the human brain. This landscape is altered by preterm birth and its profile is linked to neurodevelopmental outcomes in toddlerhood.

## Introduction

A fundamental feature of the brain's activity is the dynamic properties of its functional connectivity, with continuous shifting between different connectivity profiles or 'states'. These dynamic properties are linked to processes such as language<sup>1,2</sup>, cognition<sup>3-6</sup>, and motor function<sup>7,8</sup>. Importantly, altered brain dynamics have also been linked to the clinical features and/or cognitive dysfunction in neurodevelopmental conditions such as schizophrenia<sup>9</sup>, attention deficit hyperactivity disorder (ADHD)<sup>10</sup> and autism spectrum disorder (ASD)<sup>11</sup>. Individuals with ASD, for example, have been reported to switch between different connectivity profiles more directly, whereas typically developing individuals switch between those same brain states via an intermediate connectivity profile<sup>11</sup>. However, although it is increasingly appreciated that neurodevelopmental conditions likely have their origins in the perinatal period, little is known about the brain's dynamic properties at this critical juncture. Moreover, it is also not clear whether its dynamic characteristics are associated with later childhood neurodevelopment, and in particular, which of these characteristics signal a higher likelihood of later neurodevelopmental difficulties.

Conventional studies of "static" functional brain connectivity in early life have shown that the spatial representation of resting state networks (RSNs) appears to be relatively mature and adult-like even soon after birth<sup>12-14</sup>. It has also been confirmed that these RSNs may be disrupted by perinatal exposures, such as preterm birth<sup>12,15-17</sup>, which increase the likelihood of neurodevelopmental impairments<sup>18</sup>. However, despite the evidence for the importance of dynamics in older groups, the dynamics of these networks in early life remain to be described.

In this study we applied state-of-the-art techniques to evaluate functional Magnetic Resonance Imaging (fMRI) in a cohort of term-born ( $n=324$ ) and preterm-born babies ( $n=66$ ) scanned at term equivalent age from of the developing Human Connectome Project (dHCP), the largest publicly available population-based dataset of the healthy new-born brain<sup>19</sup>. We used two methods that tap into dynamic brain function. First, we characterised global dynamics using Kuramoto Order Parameter (KOP)<sup>20</sup> based measures, namely *mean synchronisation* and *metastability*<sup>21,22</sup> as global measures of brain synchronicity and flexibility<sup>21,23</sup>. Second, we characterised modular dynamics. That is, we identified sub-networks involved in temporal 'states', i.e., paroxysmal modes representing synchronisation of the brain, using Leading Eigenvector Analysis (LEiDA)<sup>24,25</sup>. We assessed whether neonatal brain state features (fractional occupancy, dwelling times, state mean synchronisation, and state metastability) and state transition probabilities were associated with postmenstrual age (PMA) at scan, postnatal days (PND) at scan and preterm-birth; and correlate with neurodevelopmental outcomes at 18 months measured using the Bayley Scales of Infant and Toddler Development, 3<sup>rd</sup> Edition (Bayley-III)<sup>26</sup>, and atypical social, sensory and repetitive behaviours measured by the Quantitative Checklist for Autism in Toddlers (Q-CHAT)<sup>27</sup>. This allowed us to test three hypotheses: 1) that neonatal brain dynamics quickly develop with age at scan; 2) that preterm birth alters the typical pattern of functional brain dynamics; and 3) that neonatal brain dynamics are linked to neurodevelopmental and behavioural outcome measures at age 18 months.

## Results

**Global brain dynamics.** We first assessed the association of global dynamic features with age and postnatal days at scan (PMA and PND at scan, respectively) in term-born individuals only ( $n = 324$ ). We did not observe any associations between PMA at scan and global dynamic features. Nevertheless, there was an association between PND at scan with metastability ( $t = -2.4$ ;  $p = 0.017$ , Table 1). In comparison to term-born infants, preterm-born infants had lower mean synchrony (Cohen's  $D = 0.567$  – medium effect size;  $p < 0.001$ ) and metastability ( $D = 0.454$  – medium effect size;  $p < 0.001$ ) (Figure 1AB, Table 1). We then analysed associations between global dynamic features (mean synchronisation and metastability) and neurodevelopmental markers, namely Q-CHAT and Bayley-III scores for the entire cohort (term- and preterm-born,  $n = 390$ ). Across the whole cohort, there was no significant association between metastability and any neurodevelopmental outcome, although mean synchronisation showed a weak but significant association with Q-CHAT scores ( $t = -2.57$ ;  $p = 0.011$ ), i.e., lower neonatal mean synchronisation was associated with higher Q-CHAT scores, indicative of more atypical social, sensory, and repetitive behaviours at 18 months of age (Figure 1C).

**Table 1 | Association of global dynamic features (synchrony and metastability) with PMA and PND at scan, and effect of preterm birth.**

|                      | Term ( $n = 324$ ) |                         |               |                         | Term vs Preterm ( $n = 390$ ) |                         |                |                              |
|----------------------|--------------------|-------------------------|---------------|-------------------------|-------------------------------|-------------------------|----------------|------------------------------|
|                      | PMA at scan        |                         | PND at scan   |                         | Term<br>( $n = 324$ )         | Preterm<br>( $n = 66$ ) | Cohen's<br>$D$ | $p$ -<br>value <sup>††</sup> |
|                      | $t^{\dagger}$      | $p$ -value <sup>†</sup> | $t^{\dagger}$ | $p$ -value <sup>†</sup> | [mean (S.D.)]                 |                         |                |                              |
| Mean synchronisation | 0.039              | 0.970                   | 1.143         | 0.259                   | 0.52<br>(0.08)                | 0.48<br>(0.08)          | 0.567          | $p < 0.001^*$                |
| Metastability        | 0.877              | 0.379                   | -2.403        | 0.017*                  | 0.20<br>(0.02)                | 0.19<br>(0.02)          | 0.454          | $p < 0.001^*$                |

<sup>†</sup>GLM1 (including 324 term-born babies):  $y \sim \beta_0 + \beta_1 PMA + \beta_2 PND + \beta_3 Sex + \beta_4 Motion$  outliers (FD). <sup>††</sup>GLM2 (including 324 term-born and 66 preterm-born babies):  $y \sim \beta_0 + \beta_1 Preterm-born + \beta_2 PMA + \beta_3 Sex + \beta_4 Motion$  outliers (FD). \*  $p$ -values surviving FDR multiple comparison correction with  $\alpha$  error at 5%.

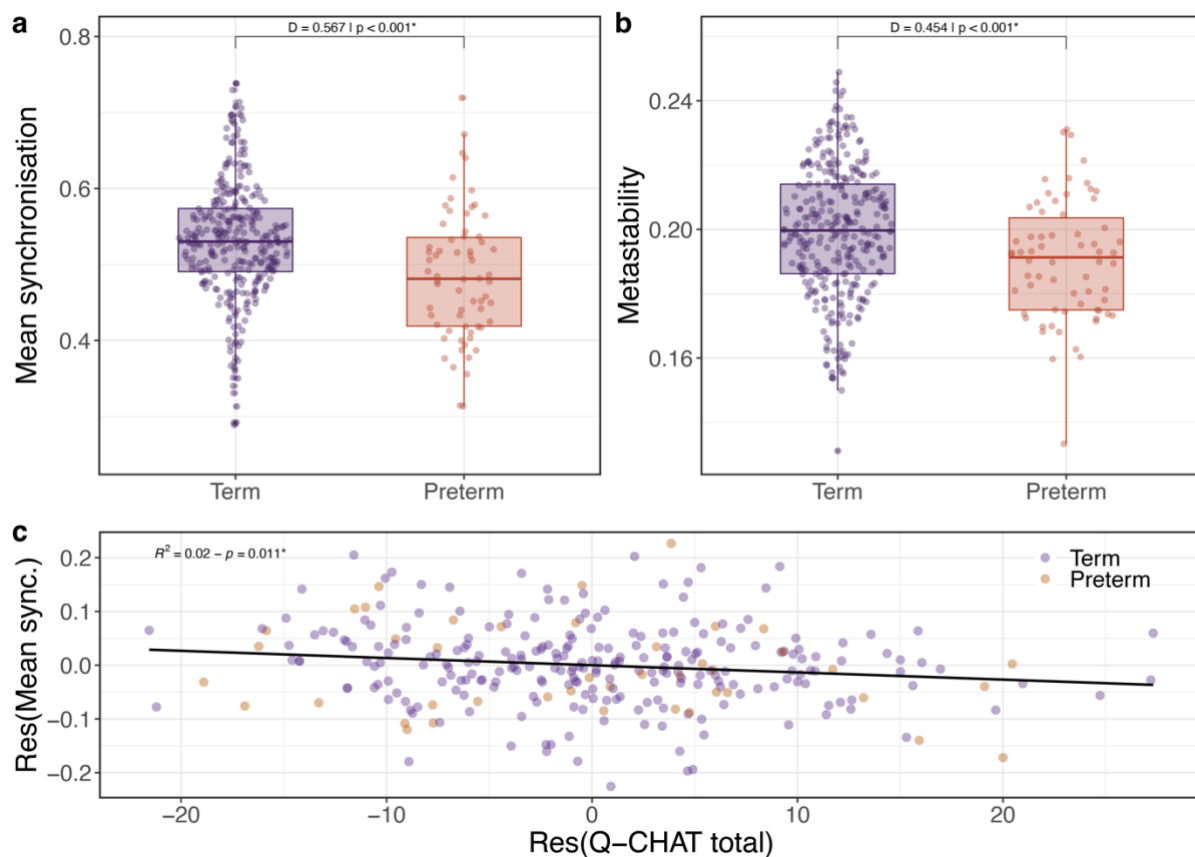

**Figure 1 | Effect of preterm-birth** on mean synchronisation (a) and metastability (b); and correlation of mean synchronisation and Q-CHAT residuals (Res.) after correcting for PMA at scan, sex, motion outliers and preterm-birth (c). \* p-values surviving FDR multiple comparison correction with  $\alpha$  error at 5%.  $R^2$ : coefficient of determination. D: Cohen's effect size.

**Neonatal brain states.** We defined six different brain states, obtained heuristically from K-Means clustering, using the LEiDA approach<sup>24,25</sup> (Figure 2). Briefly, we averaged the fMRI timeseries into 90 cortical and subcortical regions defined by the Anatomical Automated Labels (AAL) atlas adapted to the neonatal brain<sup>28</sup>. We estimated the phase synchronisation between each pair of parcels, obtaining a dynamic functional connectivity matrix for each fMRI timepoint<sup>29</sup>. We calculated the first eigenvector of each matrix, for each instant of time, and clustered those with K-Means with  $K = 6$  (see more details in *Methods* section). Three of the six states we identified showed widespread phase concordance amongst brain parcels, we refer to these as *whole-brain global synchronisation states*, namely *global state A*, *global state B*, and *global state C*. Three states were more regionally constrained: one state showed synchronous phases in the *occipital cortex (Occ. State)*; one state represented high synchrony for regions mainly in the *sensory-motor cortex (SM State)*; and one state comprised high levels of synchronisation in the frontal cortex, angular gyrus, and posterior cingulate gyrus (for simplicity we refer to this as *frontoparietal* or *FP state*).

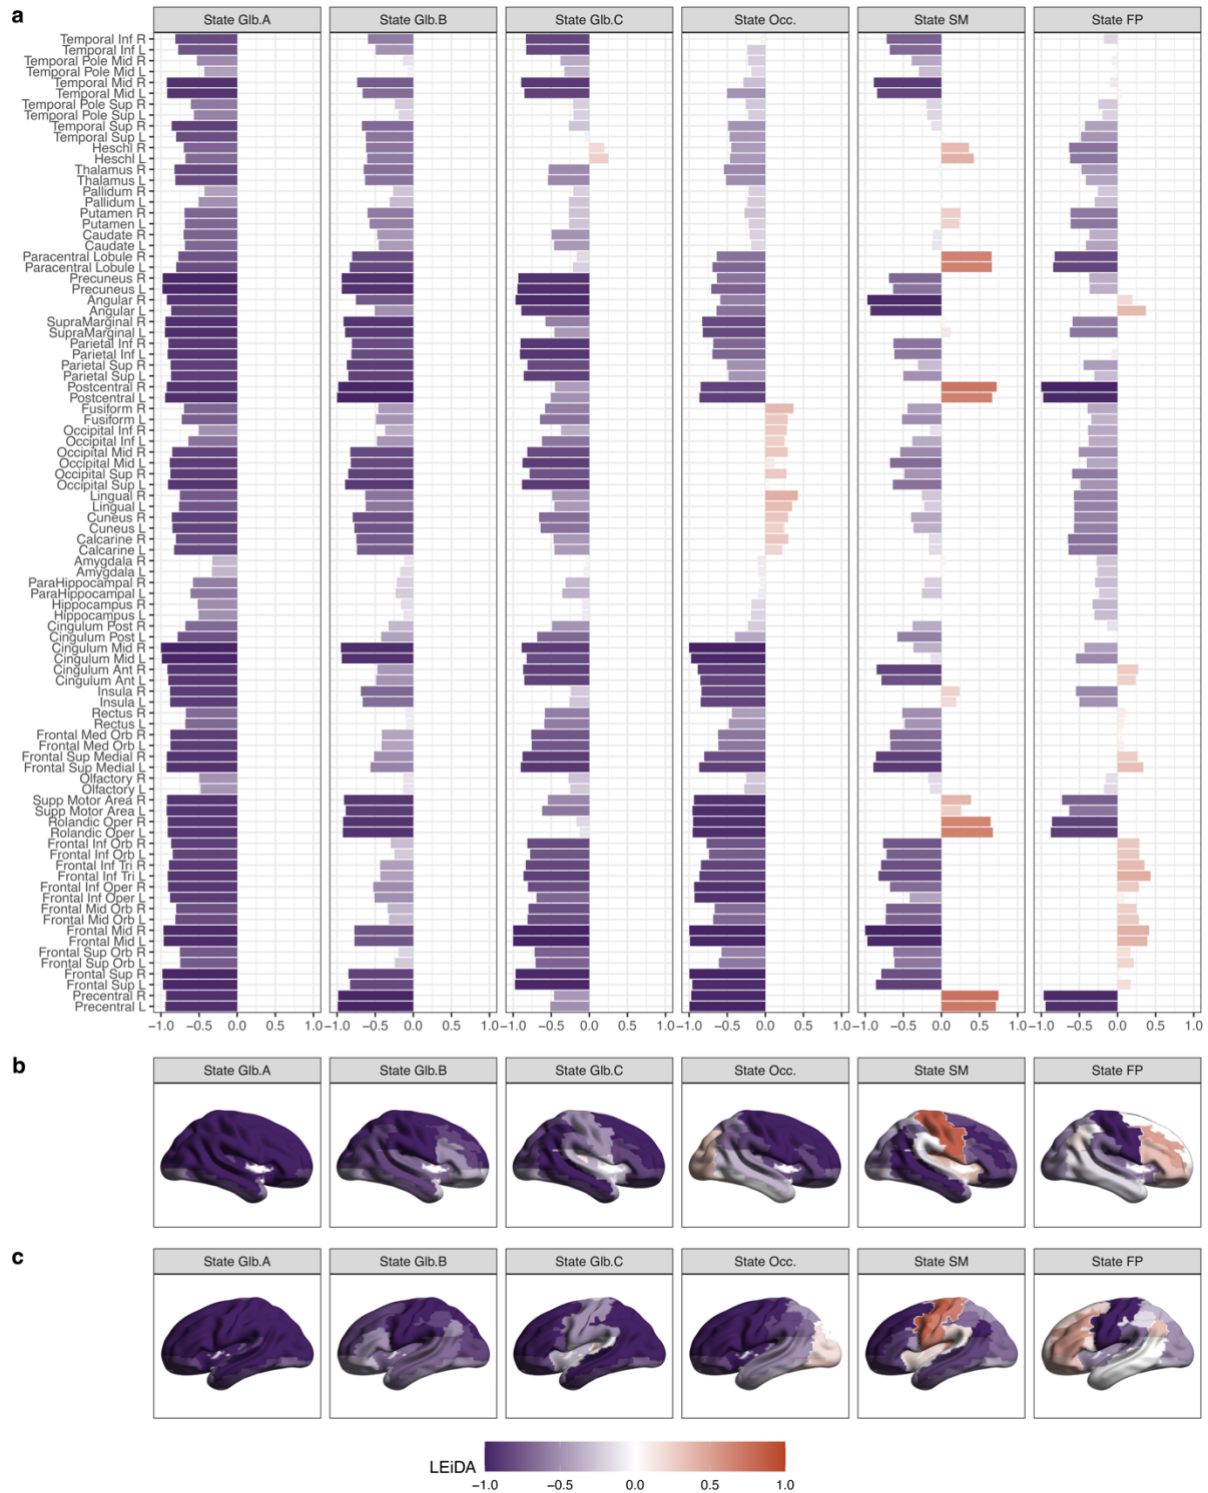

**Figure 2 | Brain states in neonates, ordered from left to right by level of global synchronicity. (a) LEiDA vectors for each of the six brain states identified in the neonatal brain using AAL parcels. (b) Representation of LEiDA on brain surfaces (right side view). (c) Representation of LEiDA on brain surfaces (left side view).**

**Landscape of modular brain dynamics in term-born neonates.** We compared the main dynamic features of the six identified states in term-born participants ( $n = 324$ ) via mean synchronisation, metastability, fractional occupancy and dwelling times markers for each state. There were significant differences between states in mean synchronisation, metastability, fractional occupancy, and dwelling times when tested using a Type III ANOVA model with Satterthwaite's method:  $F(5, 1615) = 13163$ ;  $p < 0.001$  for mean synchronisation,  $F(5, 1615) = 291$ ;  $p < 0.001$  for mean metastability,  $F(5, 1938) = 514$ ;  $p < 0.001$  for mean fractional occupancy, and  $F(5, 1938) = 734$ ;  $p < 0.001$  for mean dwelling times. Between state effects showed that global state A had increased mean synchronisation, mean fractional occupancy, and mean dwelling times when compared with the other 5 states. Moreover, global states B and C also had a heightened mean synchronisation which was intermediate between the values recorded for global state A and the other states (see Supplementary Figure S1 for between-group effects statistics). We characterised the normative brain state transition probabilities landscape in Figure 3A. Most occurrences are those of dwelling transitions, i.e., repeated continuous occurrences of the same state, with probabilities above 83% for all six states. Excluding those dwelling sequences, the 12 most frequent transitions displayed a complex profile, incorporating an indirect transition to and from the high whole-brain synchronisation global state A. These transitions occurred via the intermediate whole-brain synchronisation global states, B and C (Figure 3B).

**Modular brain state features associated with age at scan in term-born neonates.** Higher PMA at scan was positively correlated with increased dwelling times ( $t = 4.4$ ;  $p < 0.001$ ), increased fractional occupancy ( $t = 5.3$ ,  $p < 0.001$ ), and increased mean synchronisation ( $t = 3.6$ ;  $p < 0.001$ ) for global state C; and with increased fractional occupancy ( $t = 2.8$ ,  $p < 0.001$ ) and mean synchronisation in the sensory-motor state ( $t = 3.1$ ;  $p = 0.002$ ). PMA at scan was negatively correlated with increased fractional occupancy in the global state B ( $t = -2.8$ ;  $p = 0.004$ ). Postnatal age (PND at scan) was associated with shorter dwelling times in the global state B ( $t = -2.8$ ;  $p = 0.004$ ), occipital state ( $t = -2.5$ ;  $p = 0.013$ ), and sensory-motor state ( $t = -2.8$ ;  $p = 0.006$ ). Significant associations of brain state features with PMA and PND at scan that survive FDR multiple comparison are summarised in Figure 3C and Figure 3D; and compared in Figure 4G.

**Brain state transitions associated with age at scan in term-born neonates.** Higher PMA at scan was positively associated with an increased likelihood of transitioning from global state A to C ( $t = 3.2$ ;  $p = 0.002$ ), from global state B to frontoparietal state ( $t = 3.1$ ;  $p = 0.002$ ), and to stay (dwell) in global state C ( $t = 3.2$ ;  $p = 0.001$ ). Older PMA was also associated with a lower likelihood of transitioning from global state C to occipital state ( $t = -2.8$ ;  $p = 0.006$ ); and lower probability of staying in global state B ( $t = -2.9$ ;  $p = 0.005$ ). Significant associations of state transition probabilities with PMA at scan are shown in Figure 3E. Increased postnatal age (PND at scan) was associated with increased transitions from frontoparietal and occipital states into global state B [( $t = 3.1$ ;  $p = 0.002$ ) and ( $t = 3.3$ ;  $p = 0.001$ ), respectively]; increased transition from the occipital state into state C ( $t = 3.1$ ;  $p = 0.002$ ); a reduction of transition likelihood from state B into a frontoparietal state ( $t = -3.0$ ;  $p = 0.003$ ); and a reduction of probability to stay (dwell) in state C ( $t = -2.7$ ;  $p = 0.007$ ), occipital state ( $t = -3.4$ ;  $p = 0.001$ ), and sensory-motor state ( $t = -2.7$ ;  $p = 0.007$ ). Significant associations of state transition probabilities with PND at scan, all surviving FDR multiple comparison corrections, are summarised in Figure 3F. For a comparison of the distinct effect of age (PMA at scan) and postnatal experience (PND at scan) in brain state transitions see Figure 4H. Age at scan and postnatal experience had distinct correlates: for example, transitions from intermediate whole-

brain synchronisation state B to the occipital state increased with PMA at scan but decreased with PND at scan.

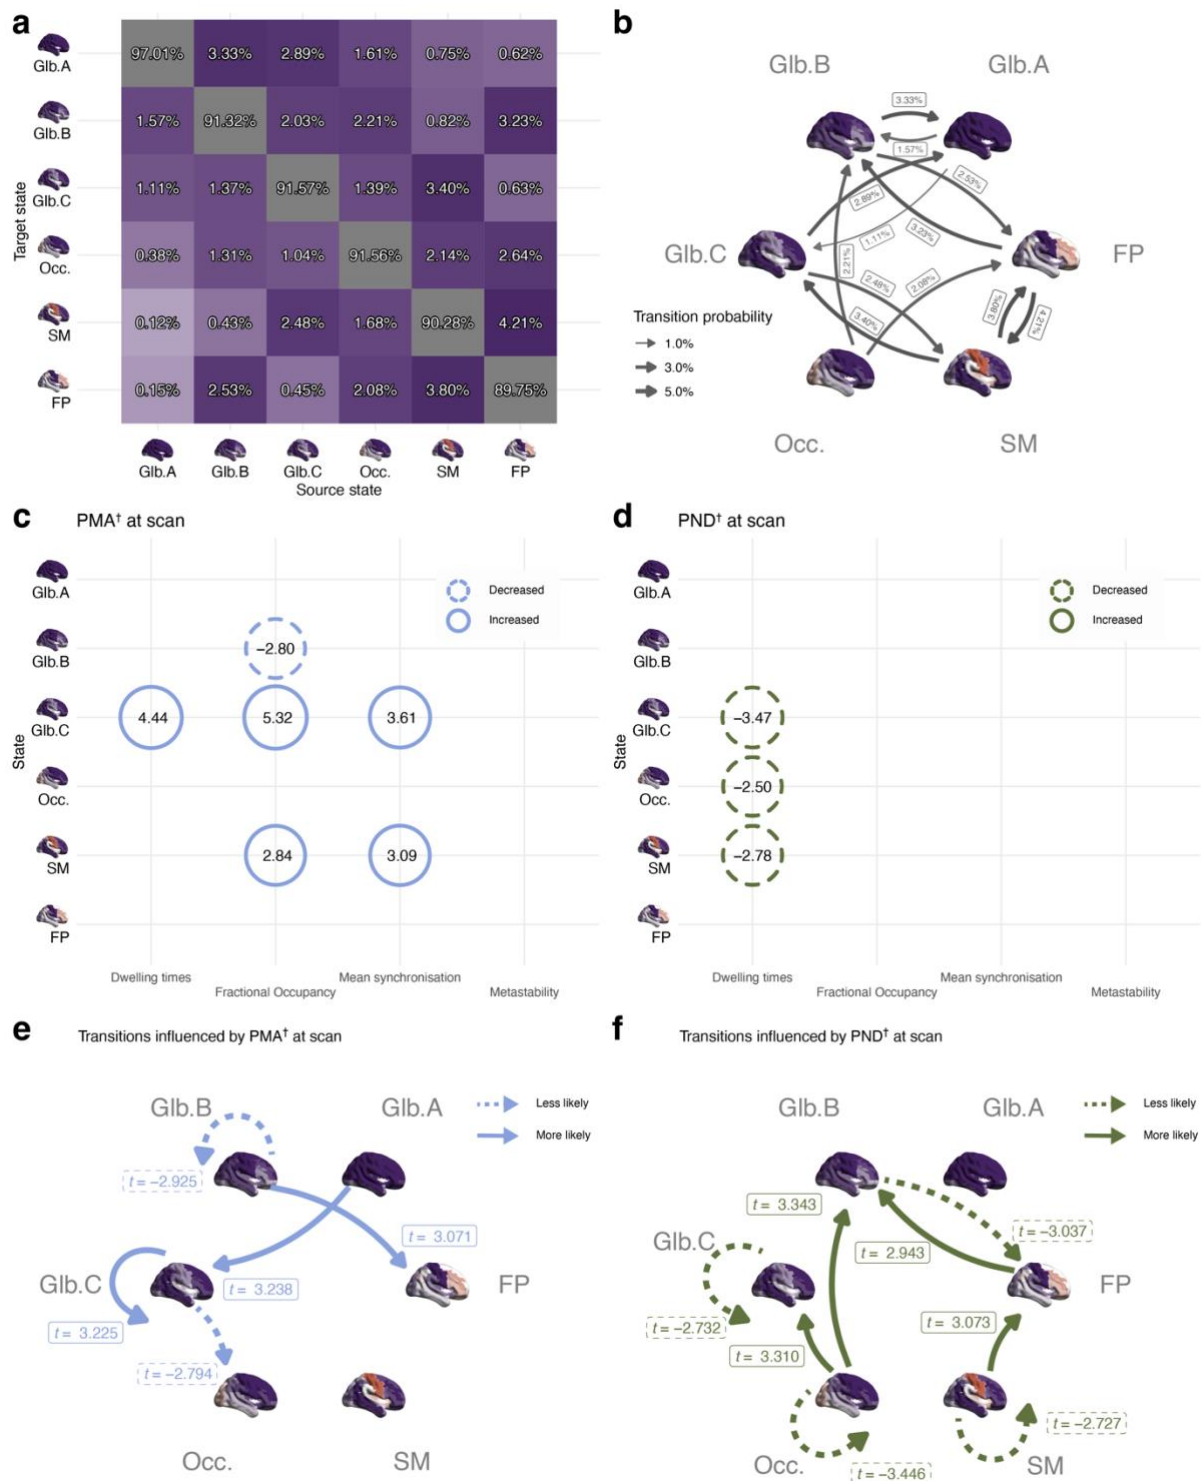

**Figure 3 | Brain dynamics in term-born children (n = 324).** (a) All transitions including dwelling state transitions. (b) Main transitions (top 12) between states excluding dwelling transitions. (c) Summary of brain state features significantly associated with PMA at scan. (d) Summary of brain state features significantly associated with PND at scan. (e) Summary of significant correlations between state transitions probabilities and PMA at scan. (f) Summary of significant correlations between state transitions probabilities and PND at scan. <sup>†</sup>GLM1



(including 324 term-born babies):  $y \sim \beta_0 + \beta_1\text{PMA} + \beta_2\text{PND} + \beta_3\text{Sex} + \beta_4\text{Motion outliers (FD)}$ . Occ.: Occipital. SM: Sensory-motor. FP: Frontoparietal. All significant associations shown in this figure survive FDR multiple comparison correction with  $\alpha$  error at 5%.

**Atypical modular brain state features in preterm born neonates.** Compared to term-born participants, preterm-born babies had shorter dwelling times for the global state A ( $t = -4.6$ ;  $p < 0.001$ , Figure 4A); decreased fractional occupancy for the global state A ( $t = -4.1$ ;  $p < 0.001$ ); and increased fractional occupancy for global state B ( $t = 3.4$ ;  $p = 0.001$ ), occipital state ( $t = 2.2$ ;  $p = 0.030$ ), and frontoparietal state ( $t = 2.7$ ;  $p = 0.009$ ) (Figure 4B). Preterm birth was also associated with lower mean synchronisation of global state A ( $t = -5.1$ ;  $p < 0.001$ ), global state B ( $t = -3.4$ ;  $p = 0.001$ ), global state C ( $t = -2.8$ ;  $p = 0.005$ ), occipital state ( $t = -2.2$ ;  $p = 0.031$ ), and frontoparietal state ( $t = -2.6$ ;  $p = 0.010$ ) (Figure 4C); and reduced metastability for the global state A ( $t = -2.5$ ;  $p = 0.014$ ) and frontoparietal state ( $t = -4.3$ ;  $p < 0.001$ ) (Figure 4D).

**Effect of preterm birth on brain dynamics and brain state transition probability.** Preterm birth was associated with an increased transition towards an occipital connectivity profile, i.e., an increased transition probability from global state A to C ( $t = 4.7$ ;  $p < 0.001$ ) and from global state C to occipital ( $t = 3.1$ ;  $p = 0.002$ ); as well as a reduction in the probability staying (dwelling) in global state A ( $t = -4.4$ ;  $p < 0.001$ ); see Figure 4F. A similar profile of results was obtained when assessing how brain dynamic features changed with gestational age at birth which essentially captures preterm and term birth in a linear way, see Supplementary Figure S2. Significant changes in transition probabilities associated with preterm-birth and their relation to associations with PMA and PND at scan are summarised in Figure 4H.

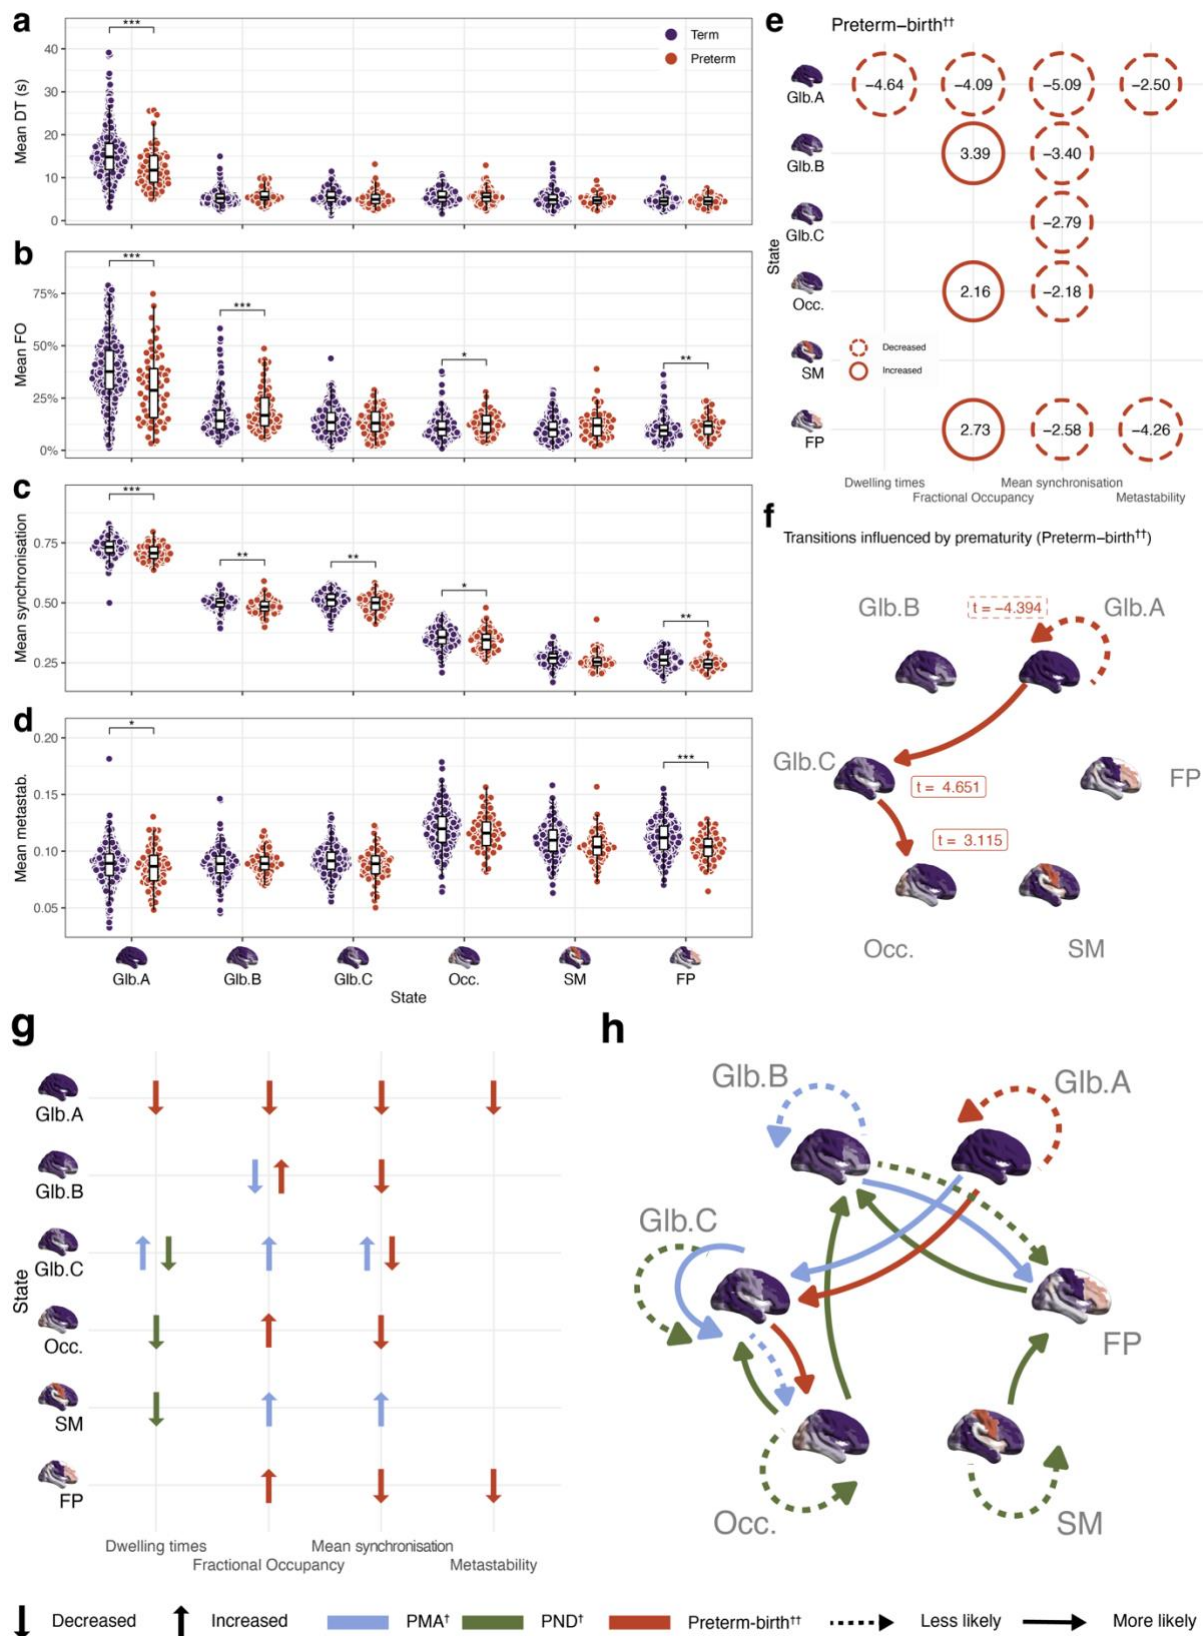

**Figure 4 | Effect of preterm birth in brain dynamics. (a)** Mean dwelling times (DT). **(b)** Mean fractional occupancy (FO). **(c)** Mean synchronisation. **(d)** Metastability. **(e)** Summary of significant associations with preterm birth **(f)** Association of state transitions probabilities and preterm birth. **(g)** Summary of brain state features significantly associated with preterm birth, and comparison with those significantly associated with PMA and PND at scan. **(h)** Summary

of brain state transition probabilities associated with increased PMA, increased PND, and/or preterm-birth. <sup>†</sup>GLM1 (324 term-born babies):  $y \sim \beta_0 + \beta_1 PMA + \beta_2 PND + \beta_3 Sex + \beta_4 Motion\ outliers\ (FD)$ . <sup>††</sup>GLM2 (324 term-born and 66 preterm-born babies):  $y \sim \beta_0 + \beta_1 Preterm-born + \beta_2 PMA + \beta_3 Sex + \beta_4 Motion\ outliers\ (FD)$ . \*  $p < 0.05$ . \*\*  $p < 0.01$ . \*\*\*  $p < 0.001$ . All significant associations highlighted survive FDR multiple comparison correction with  $\alpha$  error at 5%. Occ.: Occipital. SM: Sensory-motor. FP: Frontoparietal.

**Neonatal brain states and early childhood neurodevelopment.** Lastly, we investigated associations between brain states dynamics after birth and neurodevelopmental outcomes at 18 months of age measured with Bayley-III and Q-CHAT scores. Higher mean synchronisation of the sensory-motor state in neonates was associated with poorer performance on both Bayley's cognitive and motor scores assessed later in childhood, at 18 months of age ( $t = -3.2$ ,  $p = 0.002$ ; and  $t = -3.4$ ,  $p = 0.002$  respectively; Figure 5A). Higher Q-CHAT scores at 18 months of age were associated with higher fractional occupancy of sensory-motor state and reduced fractional occupancy of global state A ( $t = 2.5$ ,  $p = 0.014$ ; and  $t = -2.6$ ,  $p = 0.010$  respectively; Figure 5B).

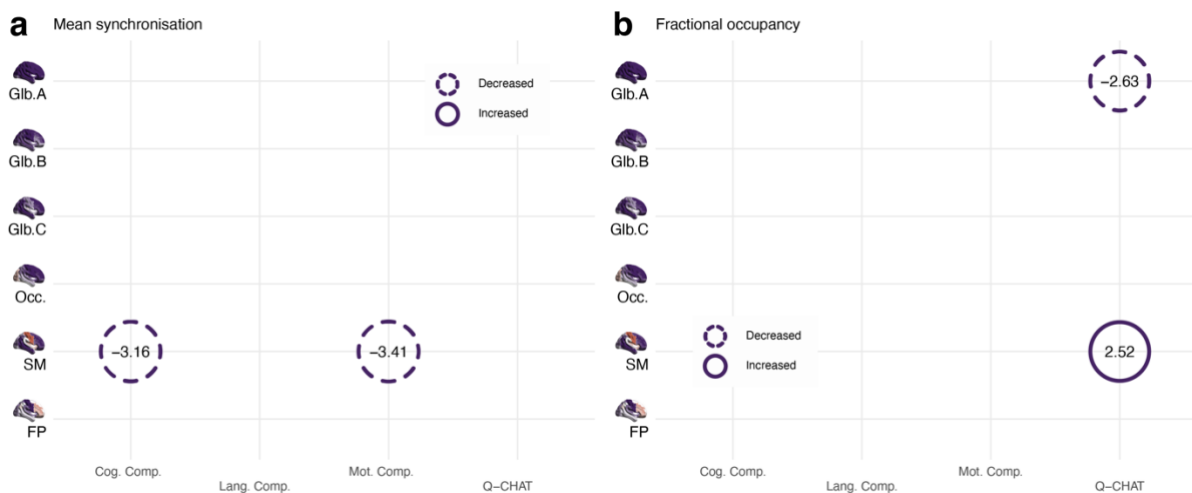

**Figure 5 | Summary of associations of brain state features with neurodevelopmental outcomes at 18 months corrected age.** Association of average (a) mean synchronisation and (b) fractional occupancy in each of the six defined brain states during perinatal period with cognitive (Cog. Comp), language (Lang. Comp.) and motor (Mot. Comp) Bayley-III composite scores and Q-CHAT scores. GLM3 (257 term-born and 48 preterm-born babies for Bayley-III; and 254 term-born and 46 preterm-born babies for Q-CHAT):  $y \sim \beta_0 + \beta_1 GA + \beta_2 PMA + \beta_3 Sex + \beta_4 Motion\ outliers\ (FD) + \beta_5 [Corrected\ age\ at\ assessment] + \beta_6 [Assessed\ component] + \beta_7 [Index\ of\ multiple\ deprivation]$ . All significant associations highlighted survive FDR multiple comparison correction with  $\alpha$  error at 5%.

## Discussion

We used global and modular fMRI signal analysis tools to investigate the characteristics of dynamic functional connectivity in a large sample of term and preterm born neonates. This is the first study to characterise the fundamental characteristics of the repertoire of brain states and their dynamics this early in human development. We found that preterm birth disrupted brain dynamics and that the profile of brain dynamics in early postnatal life is associated with a range of early childhood neurodevelopmental and behavioural outcomes at 18 months of age.

**Global dynamics.** We found that global dynamic features remained relatively stable through early development (PMA at scan) in a term-born population, although lower metastability was observed with more postnatal days at scan, suggesting that ex-utero life experience reduces brain dynamic flexibility after birth, and promotes more stable connectivity patterns. This is consistent with our observation that preterm born infants scanned at term equivalent age, and thus with greater exposure to postnatal life experience at the time of scan, had lower metastability than term born children. However, preterm babies also had lower mean synchronisation at term-equivalent age suggesting a unique pattern of alteration in brain dynamics associated with preterm birth which is independent of the extent of ex-utero life exposure (PND at scan). Lower metastability has been previously associated with impairments in cognitive flexibility of mature individuals after traumatic brain injury<sup>6</sup>. However, the negative association between duration of postnatal life and metastability observed here is unlikely to relate to cognitive flexibility, but rather reflect a refinement of network dynamics driven by primary sensory stimulation associated with ex-utero life experience. Metastability seems to be additionally reduced by term equivalent age in preterm born babies, which may be consistent with theories suggesting perinatal stress atypically accelerates brain maturation, with potentially negative long-term impact<sup>30</sup>.

Our study extends prior work which has observed that, later in childhood, very preterm born infants have suboptimal neural synchrony and altered global dynamic connectivity patterns when scanned later in childhood<sup>31</sup>. Our metrics indicate that the impact of preterm birth on brain dynamics begins much earlier in life. Such differences in preterm-born babies may have their roots in alterations in the framework of structural and functional networks reported to accompany preterm birth. For example, previous studies have shown that preterm birth is associated with altered brain structure<sup>32,33</sup>, global functional architecture<sup>15,34</sup>, and structural network changes in the neonatal period<sup>35</sup> which continue to be present at school-age<sup>36</sup> and into young adulthood<sup>37,38</sup>.

Global dynamic features were linked to later behaviour: lower mean synchronisation in the neonatal brain was associated with higher Q-CHAT scores at 18 months. Although high scores on the Q-CHAT indicate more autistic traits, in this study, the Q-CHAT captured a continuum of social, sensory, and repetitive behaviours across the normal distribution<sup>27,39</sup>. Thus, while global metrics might usefully signpost the trajectory of foundational dynamic steps of human brain development, their association with Q-CHAT should not be over-interpreted as our study was not a study of ASD and we did not examine children at an age where neurodevelopmental diagnoses begin to be formalised.

**Modular brain state profile in term-born neonates.** Summary metrics of global dynamics are likely themselves to be underpinned by much more complex activity. Therefore, we explored the emergence and behaviour of modular brain states in the early postnatal period.

We characterised six transient states in the newborn brain at term equivalent age. Amongst the three states that showed widespread concordance (global states A-C), the first encompassed nearly all of the analysed cortical regions, the second showed a higher contribution of all sensory regions (auditory, sensory-motor, and visual) and the third state showed a higher contribution of visual and frontoparietal cortices. The other three states had a more restricted/regional span with distinct contributions from sensory-motor, visual and frontoparietal regions. The majority of these states thus encompassed primary sensory networks which are already known to mature earlier than higher order networks<sup>12,15,40</sup>. This adds confidence to the results reported in studies of dynamic FC in neonates around birth. For example, Ma et al. (2020), described dynamic functional connectivity with four brain states that encompassed default-mode, dorsal attention, auditory, sensory-motor, and visual networks in 37 term neonates<sup>41</sup>. Here we establish a series of six brain states and describe associations with age at scan and postnatal days in a larger cohort with 324 term neonates.

We observed that in newborn infants, whole-brain synchrony state A had the highest mean synchronisation, as well as largest fractional occupancy and dwelling times; thus suggesting that newborn infants spend a large amount of their time in a state of global phase synchrony which is similar to the previously described dominant pattern of whole-brain synchronisation seen with both fMRI<sup>41,42</sup> and EEG<sup>43</sup>. Together with prior studies, our work supports the idea that large scale activity plays a crucial role in early brain development. Our results also align with the concept that this activity could support large scale cortical network formation and may foster the associated long-range connections, which are known to subsequently mature during the first postnatal year<sup>44,45</sup>.

**Age-related changes in modular brain states.** We observed a positive correlation of occupancy and mean synchronisation within the sensory-motor cortices with increasing PMA at scan. This supports existing evidence that this system is relatively mature, both in function and structure in comparison to other systems at birth. This may be the product of significant short-range functional reorganisation during the last foetal trimester<sup>46,47</sup> to support the functional specificity needed to respond to sensory information coming from feet, hands and mouth<sup>48,49</sup>.

We also found that increased PMA at scan, was associated with an increased probability of transitioning into frontoparietal synchronicity states comprising the anterior part of the Default Mode Network (DMN)<sup>50</sup>. This chimes with other evidence that, although this system is relatively immature at birth, it undergoes significant changes postnatally with increasing recruitment of frontoparietal areas into the network<sup>12,15</sup>. Our work suggests that this system is recruited more and more with age in the postnatal period.

There was also a significant effect of PND at scan on an increasing probability of transition from occipital to whole-brain synchronisation states. This finding is in line with key stages of neurodevelopment. Specifically, changes in transitions from an occipital cortex profile may help the maturation of visuomotor abilities and sensory integration in early infancy in the environment outside the womb<sup>51</sup>. Finally, we observed increased transitions from sensory-motor to frontoparietal structures with increasing duration of postnatal life, perhaps reflecting a move from a reliance on predominantly sensory-motor system output to behaviour informed by the higher order functions subserved by frontoparietal regions.

**Effect of preterm birth on modular brain states.** Preterm birth has been associated with a higher likelihood of atypical neurodevelopment<sup>18</sup> including a greater rate of autism diagnosis<sup>52-57</sup>. Previous studies from our group have shown preterm born infants have alterations in their

functional architecture<sup>12,15,34</sup>. Here, we extend this work to report that preterm birth also has an impact on dynamic functional connectivity, increasing fractional occupancy of occipital and frontal states and increased transitions from global to occipital state; and decreased dwelling for whole-brain high synchronisation state. Only one other study has investigated the effect of prematurity on dynamic functional connectivity<sup>41</sup>. They reported significantly shorter mean dwelling times in a state with stronger connectivity between sensory-motor and auditory cortices and significantly higher mean dwelling times for a global state<sup>41</sup>. Direct comparison with our findings is challenging however, given the higher resolution of our study in terms of a larger number of ROIs included in our study but also the power available from our larger sample. We observed multiple global states in neonates with diverse contributions from occipital and frontoparietal regions and a negative effect of prematurity on dwelling times in state A. In summary, preterm-birth shifts dynamic functional connectivity towards occipital and frontoparietal synchrony profiles and suppresses whole-brain synchronisation modes. Preterm-birth is known to impact on cognition throughout the lifespan<sup>58,59</sup>. Our results raise the possibility, that alterations in brain functional connectivity that are present soon after birth have functional consequences.

**Association with early childhood neurodevelopment.** Our work and others consistently recognise the neonatal period as a key time for sensory-motor cortical development<sup>46,48,49</sup> and subsequent transition to higher order network connectivity<sup>12,15</sup>. We extended this observation here, to show that altered brain dynamics contributes to both general developmental outcomes and more specific social, sensory, and repetitive behaviours at age 18 months. Lower levels of synchrony in the sensory-motor state around term were positively correlated with better cognitive and motor outcomes (Bayley-III) at 18 months. However, when there was lower fractional occupancy of the high whole-brain synchronisation state A and increased fractional occupancy of the sensory-motor state around birth, there were more atypical social, sensory, and repetitive traits present at 18 months, as captured by the Q-CHAT.

Thus, our work indicates that the link between brain dynamics and autistic traits is not only limited to state transitions in adulthood<sup>11,60</sup> but may comprise alterations in state occupancy and overall synchronicity as well as transitions established during early development. One possible explanation for the association between the sensory-motor cortex dynamics and later social, sensory and repetitive traits, is that altered brain dynamics in the neonatal period may predispose individuals to exhibit unusual responses to sensory stimuli<sup>61</sup>. The positive correlation of higher fractional occupancy of the sensory-motor state and a higher Q-CHAT score could also represent an overreliance on that particular network during the neonatal period – which may impact upon the development of higher order networks in the general population as a continuum.

We emphasize that we did not follow-up the children with higher Q-CHAT scores beyond 18 months, thus our work did not evaluate predictors of a confirmed diagnosis of ASD. Longitudinal studies are clearly needed, but our work adds to the evidence for persistent dysmaturation of sensory systems to autistic features across the lifespan. Sensory differences are among the first features to signal a diagnosis of ASD<sup>62,63</sup> and persist, remaining core to the diagnosis<sup>64</sup>. For example, we have reported that neonates with an increased familial likelihood of ASD had higher regional homogeneity in the sensory-motor cortex<sup>65</sup>, which fits with the higher fractional occupancy we record in this region. Studies of diagnosed individuals have reported atypical activation of the motor cortex<sup>66</sup>, which likely affects the translation of visual input into motor understanding, with a potential impact on social interaction. These functional brain differences in sensory systems are thought to arise from alterations in excitation-

inhibition pathways, especially GABA neurotransmission. Evidence includes a tight relationship between sensory processing and differences in sensory cortex GABA levels<sup>67</sup> and we have reported direct experimental proof in adults, that visual processing differences in ASD are GABA-dependent<sup>68</sup>.

**Strengths and limitations.** We studied state-of-the-art infant fMRI acquired with a dedicated neonatal multiband EPI pipeline which features high temporal resolution (TR = 392 ms) but acknowledge this has relatively low signal-to-noise ratio in the deep grey matter structures, including thalamus, basal ganglia, and brainstem<sup>69</sup>. We chose a LEiDA processing pipeline, as it provides time-resolved metrics of brain states and has been successfully applied to study brain dynamics in adults<sup>24,25</sup>. A majority of prior studies of dynamic brain functional connectivity have adopted sliding window approaches, which necessitates the choice of arbitrary parameters in the analysis, such as window and step sizes. There is little consensus on these parameters as the use of small windows can magnify spurious variations and large windows can soften sharper changes in brain dynamics<sup>70-72</sup>. Thus, the choice of a time-resolved approach like LEiDA is a strength in our methodology. However, our analysis treated brain state occurrence in an independent fashion, i.e., without memory. Future studies could benefit from developing a metric that considers how brain states are impacted by previously occurring states. Our results are also potentially limited by the use of the AAL atlas to define our regions of interest. While this atlas has been adapted for neonatal use<sup>28</sup>, structurally defined atlases could potentially poorly correlate with functional boundaries in the brain, particularly during the neonatal period<sup>73,74</sup>. A possible solution for future work could be the adaptation and use of multi-modal generated surface atlases for neonatal fMRI studies<sup>75</sup>.

In our analysis, we didn't consider the effect of socio-demographic factors and social deprivation in early neurodevelopmental outcomes beyond using the Index of Multiple Deprivation scores as a covariate. However, multiples studies have shown that family psychosocial and socio-demographic factors have a significant impact on brain development in childhood; with factors such as maternal stress, depression, low education, maternal immigration status, maternal age greater than 35 years, paternal age over 38 years and low household income all being linked to poorer developmental outcomes<sup>76-80</sup>. Thus, further studies could benefit from evaluating links between these wider socio-demographic markers and brain dynamics in early childhood<sup>81</sup>.

## Conclusions

In this study we evaluated global functional brain dynamics and transient brain states in the newborn brain. Our approach allowed us to define a set of six fundamental transient brain states, which are comprised by structures previously shown to be established in earlier phases of brain development. We have highlighted the impact brain maturation has on brain dynamics, as well as atypical patterns associated with preterm birth. Brain state dynamics at birth appear to be functionally relevant as they are correlated with a range of neurodevelopmental outcomes in early childhood. This encourages further work to understand their prognostic value and regulation to guide support and intervention where appropriate.

## Methods

**Participants.** We analysed a total of 390 (out of 809) datasets from the dHCP (release 3)<sup>19</sup> acquired from both term ( $n = 324$ ) and preterm born (gestational age (GA) at birth  $< 37$  weeks;  $n = 66$ ) babies. Full inclusion and exclusion criteria and sample excluded at each step are detailed in Supplementary Figure S3. Term-born babies were born at median GA at birth of 40.14 weeks (IQR = 1.86 weeks) and scanned soon after birth (median postmenstrual age (PMA) at scan = 41.57, IQR = 2.43 weeks). Preterm-born babies were born at a median GA at birth of 33.36 weeks (IQR = 5.86 weeks) and scanned at term-equivalent age (median PMA at scan = 40.5 (IQR = 2.71)). Table 2 shows demographic data of the sample. The distribution of PMA at scan and GA at birth for the individuals included in this study is shown in Supplementary Figure S4. All children were invited to the Centre for the Developing Brain, St Thomas' Hospital, London, for neurodevelopmental evaluation by experienced paediatricians or psychologists at 18 months after expected delivery date. The Bayley Scales of Infant and Toddler Development, Third Edition (Bayley-III)<sup>26</sup> were used to assess general developmental outcomes across motor, language and cognitive domains in 305 individuals from the total population, comprising 257 infants born at term and 48 born preterm (higher scores indicate greater skills). The Quantitative Checklist for Autism in Toddlers (Q-CHAT)<sup>27</sup> at 18 months corrected age was available in 300 individuals (254 born at term and 46 born preterm), as a measure of atypical social, sensory and repetitive behaviours which occur as a continuum in the population<sup>27</sup>. Although higher Q-CHAT scores may indicate more threshold or subthreshold autistic traits, we emphasize our use of this instrument was to capture behaviours not tapped by the BSID-III, rather than to screen for ASD. The index of multiple deprivation (IMD) rank – a composite measure of geographical deprivation estimated from the address of the mother at the time of birth<sup>82</sup> – was obtained for every subject and included as a covariate for models aimed at assessing the relationship between neonatal brain dynamics and subsequent neurodevelopmental and behavioural outcomes.

**MRI acquisition.** We evaluated fMRI scans obtained as part of the dHCP at the Evelina Newborn Imaging Centre, Evelina London Children's Hospital, using a 3 Tesla Philips Achieva system (Philips Medical Systems). Ethical approval was given by the UK National Research Ethics Authority (14/LO/1169), and written consent was obtained from all participating families prior to data collection. Scans were performed without sedation in a dedicated neonatal set-up with optimised transport system, positioning devices, hearing protection, and custom-built 32-channel receive head coil and acoustic hood<sup>83</sup>. Scans were supervised by a neonatal nurse or paediatrician who monitored heart rate, oxygen saturation and temperature throughout the duration of the scan. Blood-oxygen-level-dependent (BOLD) fMRI was acquired using a multi-slice echo planar imaging sequence with multiband excitation (factor 9) (repetition time (TR) = 392 ms, echo time (TE) = 38 ms, voxel size = 2.15 x 2.15 x 2.15 mm, flip angle = 34°, 45 slices, total time = 15 m 3 s, number of volumes = 2300)<sup>19</sup>. Anatomical images were acquired for brain morphometry and clinical reporting<sup>19</sup>. T1-weighted images had a reconstructed spatial resolution = 0.8 x 0.8 x 0.8 mm, field of view = 145 x 122 x 100 mm, TR = 4795 ms. T2-weighted images had a reconstructed spatial resolution = 0.8 x 0.8 x 0.8 mm, field of view = 145 x 145 x 108 mm, TR = 12 s, TE = 156 ms. fMRI datasets with excessive motion (more than 10% of motion outliers<sup>15</sup>), or incidental MRI findings of clinical significance (radiology scores 4 or 5 which indicate major lesions within white matter, cortex, basal ganglia or cerebellum – as described in dHCP database<sup>19</sup>) were excluded. In cases of twin/triplet scans only one infant was included (the one with least motion outliers during acquisition).



**Table 2. Demographic details of the term- and preterm-born groups.**

|                                                           | Term ( <i>n</i> = 324) | Preterm ( <i>n</i> = 66) | Statistic           | <i>p</i> -value  |
|-----------------------------------------------------------|------------------------|--------------------------|---------------------|------------------|
| <b>Demographics &amp; Clinical Details</b>                |                        |                          |                     |                  |
| GA at birth [in weeks] (S.D.)                             | 40.04 (1.26)           | 32.79 (3.40)             | 12.814 <sup>a</sup> | <i>p</i> < 0.001 |
| PMA at scan [in weeks] (S.D.)                             | 41.60 (1.67)           | 40.60 (2.13)             | 3.615 <sup>a</sup>  | <i>p</i> < 0.001 |
| PND at scan [in weeks] (S.D.)                             | 1.56 (1.34)            | 7.81 (4.62)              | -9.857 <sup>a</sup> | <i>p</i> < 0.001 |
| IMD <sup>†††</sup> (S.D.)                                 | 13892.19<br>(7481.54)  | 17960.02<br>(7679.92)    | -3.269 <sup>a</sup> | <i>p</i> < 0.001 |
| Sex [female count] (%)                                    | 149 (45.99)            | 26 (39.39)               | 0.716 <sup>b</sup>  | <i>p</i> = 0.398 |
| % FD outliers (S.D.)                                      | 5.38 (2.62)            | 4.52 (2.49)              | 2.451 <sup>a</sup>  | <i>p</i> = 0.014 |
| <b>Follow-up</b>                                          |                        |                          |                     |                  |
| Corrected age at follow-up <sup>†</sup> [months] (S.D.)   | 18.83 (1.30)           | 18.71 (1.35)             | 0.672 <sup>a</sup>  | <i>p</i> = 0.503 |
| Uncorrected age at follow-up <sup>†</sup> [months] (S.D.) | 18.82 (1.34)           | 20.40 (1.45)             | -7.060 <sup>a</sup> | <i>p</i> < 0.001 |
| Bayley III <sup>†</sup> - cognitive (S.D.)                | 101.56 (10.70)         | 99.90 (13.11)            | 0.618 <sup>a</sup>  | <i>p</i> = 0.538 |
| Bayley III <sup>†</sup> - motor (S.D.)                    | 102.25 (9.72)          | 99.65 (10.26)            | 1.733 <sup>a</sup>  | <i>p</i> = 0.083 |
| Bayley III <sup>†</sup> - language (S.D.)                 | 99.33 (15.72)          | 95.69 (15.85)            | 1.155 <sup>a</sup>  | <i>p</i> = 0.249 |
| Q-CHAT <sup>††</sup> (S.D.)                               | 29.90 (8.51)           | 31.63 (11.81)            | -0.682 <sup>a</sup> | <i>p</i> = 0.497 |

<sup>†</sup>Bayley Scales of Infant Development: Third Edition (Bayley-III)- # of complete assessments: 257 term, 48 preterm

<sup>††</sup>Quantitative Checklist for Autism in Toddlers (Q-CHAT)- # of complete assessments: 254 term, 46 preterm

<sup>†††</sup>Index of Multiple Deprivation - # of complete assessments: 247 term, 43 preterm

<sup>a</sup>Z (Mann-Whitney U-test), <sup>b</sup> $\chi^2$ -test

FD – Framewise Displacement

**Data processing.** Individual fMRI datasets were pre-processed according to the dHCP dedicated neonatal pipeline (Fitzgibbon et al., 2020). Briefly, local distortion due to field inhomogeneity was corrected using *topup*<sup>84</sup>; intra- and inter-volume motion correction; and associated dynamic distortions correction using rigid-body realignment and slice-to-volume *eddy*<sup>85</sup>. Residual motion, multiband acquisition, and cardiorespiratory artefacts were regressed out using FSL FIX<sup>86</sup>.

Head motion has been shown to produce spurious and systematic correlations in resting state fMRI<sup>87</sup>. In addition to specific processing steps within the dHCP pipeline implemented to minimise motion artifact on the BOLD signal<sup>69</sup>, we also evaluated motion magnitude for each dataset using framewise displacement (FD)<sup>87</sup>. To minimise the effects of motion (and/or any likely associated differences) on the determination of brain states, only participants with less than 10% motion outliers (defined as  $FD > 75^{\text{th}}$  centile + 1.5\*IQR) were selected for the final analysed subsample. The total number of motion outliers was additionally used as a covariate of control in the analysis models described in the statistics section.

We segmented the T2-weighted volumes into 9 tissue types including white matter, grey matter, and cerebrospinal fluid with a dedicated neonatal tissue segmentation pipeline<sup>88</sup>. We parcellated each subject's T2-weighted volume in 90 cortical and subcortical parcels using the Anatomical Automated Labels (AAL) atlas<sup>89</sup>, mapped to the neonatal brain<sup>28</sup>, adapted and manually corrected into the dHCP high-resolution template<sup>90</sup>. We transformed the AAL atlas from template space into each subject's native space with a non-linear registration based on a diffeomorphic symmetric image normalisation method (SyN)<sup>91</sup> using T2-weighted contrast and

the segmentation obtained previously. Grey matter segmentation and parcels were propagated from T2-weighted native space into each subject's fMRI space with a boundary-based linear registration available as part of the functional dHCP processing pipeline<sup>69</sup>. Average BOLD timeseries were then calculated for each of the 90 AAL parcels in their intersection with grey matter, deep grey matter, or basal ganglia segmentation masks, as appropriate.

**Analysing BOLD timeseries.** We filtered the BOLD timeseries with a bandpass Butterworth second order filter in the range of 0.02-0.10 Hz<sup>25</sup> and obtained the phases  $\varphi_j(t)$  for each parcel in time with the Hilbert transform. For a given real signal  $s(t)$ , we built a complex signal  $z(t)$ <sup>29,92</sup> given by:

$$z(t) = s(t) + iH[s(t)] \quad (1)$$

In which  $H[s(t)]$  represented a Hilbert transform applied to the real signal  $s(t)$  and is defined below, with p.v. consisting of Cauchy principle value<sup>92</sup>:

$$H[s(t)] = p. v. \int_{-\infty}^{\infty} \frac{s(t-\tau)}{\pi t} dt \quad (2)$$

The phases  $\varphi_j(t)$  for each parcel can be calculated directly from  $z(t)$ :

$$\varphi(t) = \arctan \left( \frac{H[s(t)]}{s(t)} \right) \quad (3)$$

**Kuramoto Order Parameter.** The Kuramoto Order Parameter (KOP) measures the global level of synchronicity of multiple oscillators and is defined in equation below, where  $\varphi_j(t)$  is the signal phase of an oscillator  $j$  at a given time. In our study, each brain parcel (AAL region) is treated as an independent oscillator.

$$KOP(t) = \frac{1}{N} \left| \sum_{j=1}^N e^{i\varphi_j(t)} \right| \quad (4)$$

Once KOP was obtained for every time point, we obtained the mean KOP (synchrony aggregate over time, referred as “*mean synchronisation*”), KOP standard deviation (referred as “*metastability*”)<sup>21,22</sup>. Mean KOP provides a broad measure of whole brain synchronicity, whereas metastability provides a measure of how synchronisation between different oscillators fluctuates over time, i.e., brain flexibility<sup>6,21,23</sup>.

**The Leading Eigenvector Analysis (LEiDA).** KOP analyses can provide insight on global dynamic properties over all oscillators (brain parcels); but cannot inform which specific brain structures might be involved in those changes. To evaluate such modular (local) properties we applied the LEiDA approach – which allowed us to investigate phase coherence in different sets of parcels. To do so we first calculated the phase difference between a parcel  $i$  and a parcel  $j$  at every instant (TR), using the cosine distance:

$$\Delta\varphi_{ij}(t) = \cos(\varphi_j(t) - \varphi_i(t)) \quad (5)$$

This results in a symmetric dynamic functional connectivity matrix for each fMRI volume. We then obtain a lower-dimensional representation with the LEiDA approach<sup>24,25</sup>, whereby the

LEiDA vector corresponds to the first eigenvector of the decomposition of the matrix  $\Delta\varphi_{ij}(t)$ . This method has been previously shown to reveal information on the community structure of networks and graphs<sup>93</sup>. Once the LEiDA vectors were obtained, we clustered them using K-Means<sup>24,25</sup> with the optimal  $K$  (six) determined heuristically with the Calinski-Harabasz and Davies-Bouldin methods (Supplementary Figure S5).

Each cluster represents a set of LEiDAs, and we refer to each of these as a *brain state*. The dynamics of such states can be studied with three main metrics: fractional occupancy – which refers to the total proportion of time spent in a given state or probability of that state; dwelling time – which consists of the average continuous time spent on each state; and Markovian probabilities of transitions between each state<sup>24,25</sup>. In addition, we also calculated values for mean synchronisation and metastability for each state by averaging those for the volumes belonging to each cluster.

**Statistics.** Firstly, we restricted our sample to the term-born individuals only ( $n = 324$ ) and evaluated the effect of brain maturation and ex-utero experience (with PMA and PND at scan, respectively) in global and modular brain dynamics. Secondly, we evaluated the effects of prematurity in brain dynamics by studying the entire sample of 390 individuals. Finally, we evaluated the association of global and modular dynamic features with later neurodevelopmental outcomes at 18 months corrected age ( $n = 305$  – Bayley-III;  $n = 300$  – Q-CHAT).

**Global dynamics.** We characterised the effect of age and postnatal experience (PMA and PND at scan) by fitting the linear model GLM1 (324 term-born babies):  $y \sim \beta_0 + \beta_1PMA + \beta_2PND + \beta_3Sex + \beta_4[Motion\ outliers\ (FD)]$ . To characterise the effect of preterm birth on brain dynamics, we fitted the linear model GLM2 (324 term-born and 66 preterm-born babies):  $y \sim \beta_0 + \beta_1Preterm-born + \beta_2PMA + \beta_3Sex + \beta_4[Motion\ outliers\ (FD)]$ . We assessed the association of brain global dynamics with cognitive and behavioural outcome measures, i.e., Bayley-III and Q-CHAT, at 18 months in a model given by GLM3 (257 term-born and 48 preterm-born babies for Bayley-III scores; and 254 term-born and 46 preterm-born babies for Q-CHAT):  $y \sim \beta_0 + \beta_1GA + \beta_2PMA + \beta_3Sex + \beta_4[Motion\ outliers\ (FD)] + \beta_5[Corrected\ age\ at\ assessment] + \beta_6[Assessed\ Component] + \beta_7[Index\ of\ Multiple\ Deprivation]$  (with *Assessed Component* consisting of Bayley’s cognitive, Bayley’s language, Bayley’s motor, or Q-CHAT total scores).

**Modular dynamics: brain states.** Firstly, we tested differences between the brain states defined in this study in terms of their mean synchronisation, metastability, fractional occupancy, and dwelling times per subject via a type III ANOVA with Satterthwaite’s method<sup>94</sup> and the linear mixed effects model GLME1 (including 324 term-born):  $y \sim \beta_0 + \beta_1State + (1 | Subject\ ID)$  – with Subject ID accounting for the random effect. By fitting GLM1 (324 term-born babies):  $y \sim \beta_0 + \beta_1PMA + \beta_2PND + \beta_3Sex + \beta_4[Motion\ outliers\ (FD)]$ , we characterised the effect of age (PMA at scan) and postnatal experience (PND at scan) on fractional occupancy, dwelling times, mean synchronisation, and metastability for each of the six brain states.

Secondly, to characterise the effect of preterm birth on brain states and state-change probabilities, we fitted GLM2 (324 term-born and 66 preterm-born babies):  $y \sim \beta_0 + \beta_1Preterm-born + \beta_2PMA + \beta_3Sex + \beta_4[Motion\ outliers\ (FD)]$  and GLM3 (324 term-born and 66 preterm-born babies):  $y \sim \beta_0 + \beta_1GA + \beta_2PMA + \beta_3Sex + \beta_4[Motion\ outliers\ (FD)]$ .

Thirdly, we assessed the association of brain dynamics with neurodevelopmental outcome measures (i.e., Bayley-III and Q-CHAT at 18 months) in a model given by GLM4 (257 term-born and 48 preterm-born babies for Bayley-III; and 254 term-born and 46 preterm-born babies for Q-CHAT):  $y \sim \beta_0 + \beta_1GA + \beta_2PMA + \beta_3Sex + \beta_4[Motion\ outliers\ (FD)] + \beta_5[Corrected\ age\ at\ assessment] + \beta_6[Assessed\ component] + \beta_7[Index\ of\ Multiple\ Deprivation]$  (with *Assessed Component* consisting of Bayley's cognitive, Bayley's language, Bayley's motor, or Q-CHAT total scores).

**Statistical significance and repeated measures.** We evaluated the statistical significance of each variable of interest with permutation tests with 10,000 repetitions for all GLMs. P-values are reported uncorrected, highlighting those surviving multiple comparison correction using the False Discovery Rate (FDR) method with  $\alpha$  error at 5%<sup>95</sup>.

**Data and software availability.** The fMRI datasets and clinical data analysed in this study are available as part of the dHCP's third data release, which can be obtained from <https://data.developingconnectome.org>. Pre-processed BOLD timeseries data used in this study are available in <https://dx.doi.org/10.5281/zenodo.7053984>. Dynamic properties of the BOLD signal fluctuations were assessed with dynFC: CoDe-Neuro's Dynamic Functional Connectivity Tools, a set of scripts written in Python v3.7 (<https://code-neuro.github.io/dynfc/>), and supporting libraries *Numpy*, *SciPy*, *Scikit-learn*, *pickle*, *h5py*, *pandas*, *os*, *sys*, and *feather*.

Statistics and figures were produced in R programming language and auxiliary packages *ggplot2*, *tidyr*, *dplyr*, *cowplot*, *purrr*, *RColorBrewer*, *knitr*, *janitor*, *ggExtra*, *stringr*, *rjson*, *broom*, *Tidymodels*, *coin*, *shadowtex*, *effsize*, *modelr*, *ggimage*, *ggpubr*, *patchwork*, *ggbeeswarm*, *ggrepel*, *ggtext*, *MetBrewer*, *lmerTest*, *forcats*, *stateR*, *p-testR*, *broom.mixed*, *lme4*, and *DiagrammeR*.

Brain volume images were produced with BrainNet Viewer and Tools for NIfTI and ANALYZE images. All scripts used in this article's statistics and figures; and relevant instructions on how to run them, are available in [https://github.com/CoDe-Neuro/neonatal\\_dfc](https://github.com/CoDe-Neuro/neonatal_dfc).

## Funding

This work was supported by the European Research Council under the European Union's Seventh Framework Programme (FP7/20072013)/ERC grant agreement no. 319456 (dHCP project) and a Wellcome Trust Seed Award in Science [217316/Z/19/Z] to DB. The authors acknowledge infrastructure support from the National Institute for Health Research (NIHR) Mental Health Biomedical Research Centre (BRC) at South London, Maudsley NHS Foundation Trust and Institute of Psychiatry, Psychology and Neuroscience, King's College London and the NIHR-BRC at Guys and St Thomas' Hospitals NHS Foundation Trust (GSTFT). The authors also acknowledge support in part from the Engineering and Physical Sciences Research Council (EPSRC) Centre for Medical Engineering at Kings College London [WT 203148/Z/16/Z], MRC strategic grant [MR/K006355/1], Medical Research Council Centre grant [MR/N026063/1], the Department of Health through an NIHR Comprehensive Biomedical Research Centre Award (to Guy's and St. Thomas' National Health Service (NHS) Foundation Trust in partnership with King's College London and King's College Hospital NHS Foundation Trust), the Sackler Institute for Translational Neurodevelopment at King's College

London and the European Autism Interventions (EU-AIMS) trial and the EU AIMS-2-TRIALS, a European Innovative Medicines Initiative Joint Undertaking under Grant Agreements No. 115300 and 777394, the resources of which are composed of financial contributions from the European Union's Seventh Framework Programme (Grant FP7/2007–2013). SFM and OGG were supported by grants from the UK Medical Research Council [MR/N013700/1] and [MR/P502108/1] respectively. JOM, TA, GM and ADE received support from the Medical Research Council Centre for Neurodevelopmental Disorders, King's College London [MR/N026063/1]. LCG is supported by a Beatriz Galindo Fellowship from MCIU/UPM-Spain [BGP18/00178] and line Support for R&D Projects for Beatriz Galindo researchers from CAM-Spain. JJT was supported by grants from the Finnish Medical Foundation, Sigrid Juselius Foundation, Signe and Ane Gyllenberg Foundation and Emil Aaltonen Foundation. JOM is supported by a Sir Henry Dale Fellowship jointly funded by the Wellcome Trust and the Royal Society [206675/Z/17/Z]. TA is supported by an MRC Clinician Scientist Fellowship [MR/P008712/1] and Transition Support Award [MR/V036874/1]. The authors acknowledge use of the research computing facility at King's College London, Rosalind (<https://rosalind.kcl.ac.uk>), which is delivered in partnership with the National Institute for Health Research (NIHR) Biomedical Research Centres at South London & Maudsley and Guy's & St. Thomas' NHS Foundation Trusts, and part-funded by capital equipment grants from the Maudsley Charity (award 980) and Guy's & St. Thomas' Charity (TR130505). The views expressed are those of the authors and not necessarily those of the NHS, the National Institute for Health Research, or the Department of Health. The funders had no role in the design and conduct of the study; collection, management, analysis, and interpretation of the data; preparation, review, or approval of the manuscript; and decision to submit the manuscript for publication.

## Author contributions

**Conceptualisation:** LGSF, DB; **methodology:** LGSF, SFG, LCG, ANP, GD, JVH, DB;  
**data analysis:** LGSF, DB; **data acquisition:** JC, SF, EH, RD, JVH, ANP, AC, TA;  
**interpretation of results:** LGSF, JC, OGG, SFM, ED, JJT, GD, SJC, JOM, AC, CN, TA, ADE, GMA, DB; **funding acquisition:** DB, GMA, ADE; **project administration:** DB, GMA, ADE; **supervision:** DB, GMA; **writing—original draft:** LGSF, JC, DB; **writing—review & editing:** All authors.

## Competing interests

The authors report no competing interests.

## Supplementary Figures

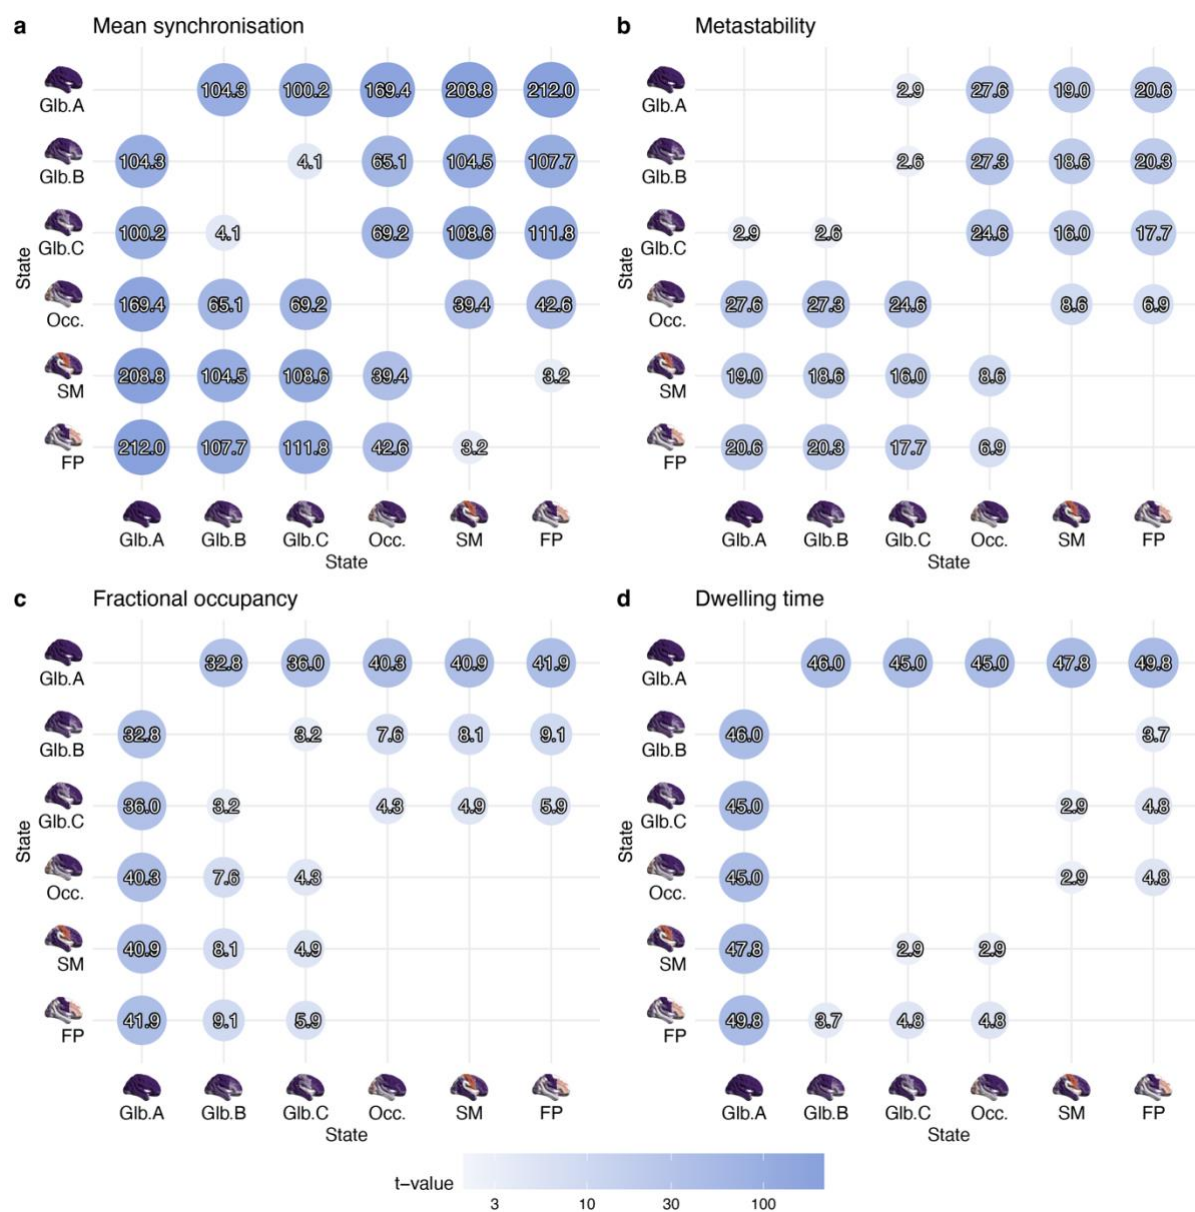

**Supplementary Figure S1.** ANOVA post-hoc tests for a) Mean synchronisation, b) Metastability, c) fractional occupancy, and d) dwelling times.

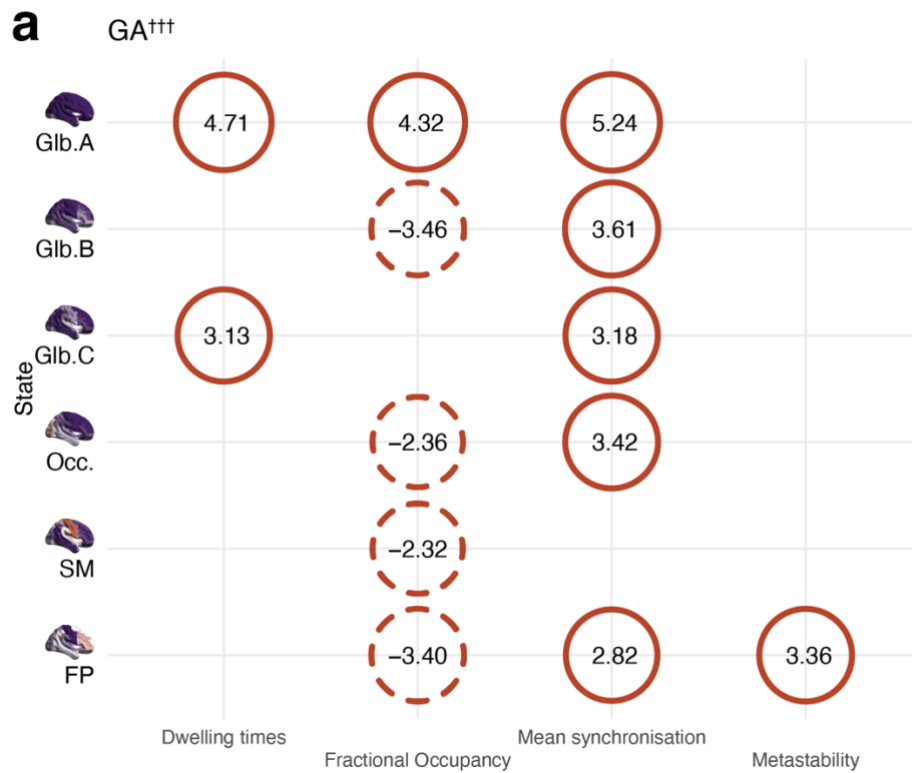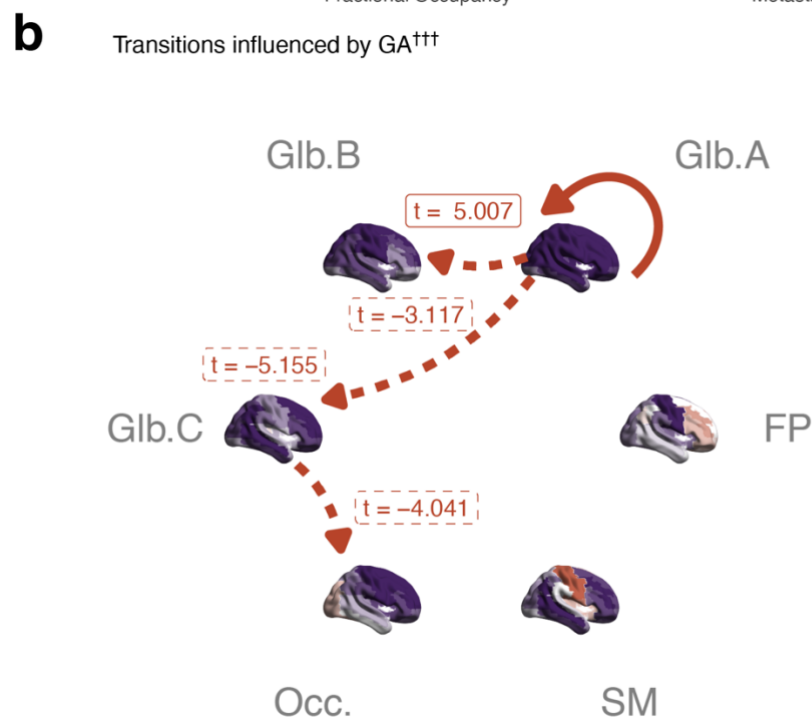

**Supplementary Figure S2. Modular analysis of neonatal brain dynamics.** (A) Summary of associations between each of the four metrics (dwelling times, fractional occupancy, mean synchronisation, metastability) and GA at birth. (B) Association of state transition probabilities and GA at birth. <sup>†††</sup>GLM3 (including 324 term-born and 66 preterm-born babies):  $y \sim \beta_0 + \beta_1GA + \beta_2PMA + \beta_3Sex + \beta_4Motion$  outliers (FD). \*  $p < 0.05$ . \*\*  $p < 0.01$ . \*\*\*  $p < 0.001$ . Occ.: Occipital. SM: Sensory-motor. FP: Frontoparietal.

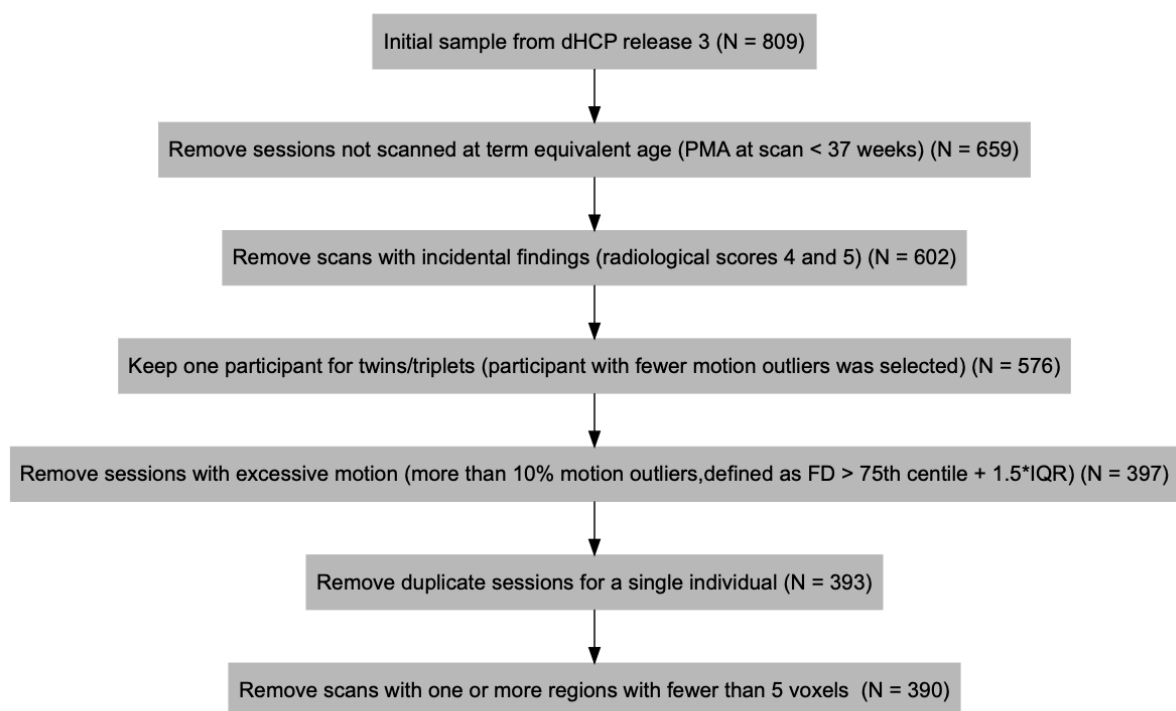

**Supplementary Figure S3.** Exclusion criteria flowchart.



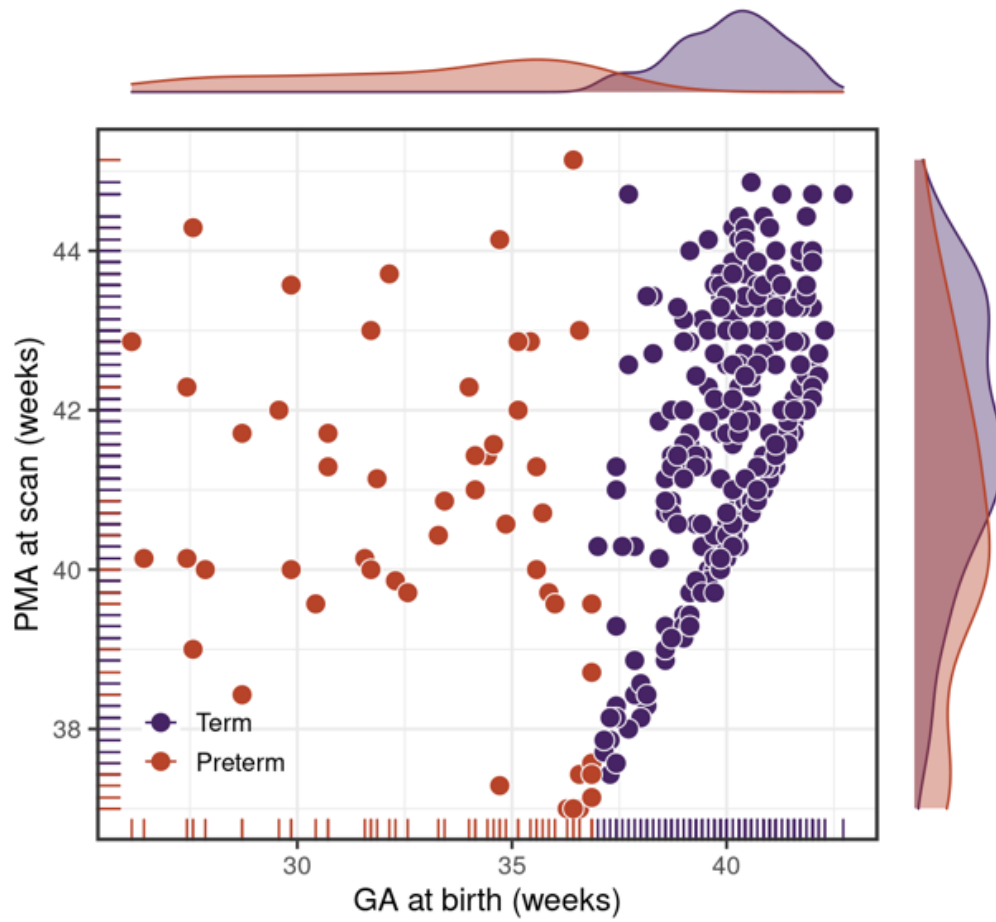

**Supplementary Figure S4.** Distribution of gestational age (GA) at birth and postmenstrual age (PMA) at scan for the participants included in this study.

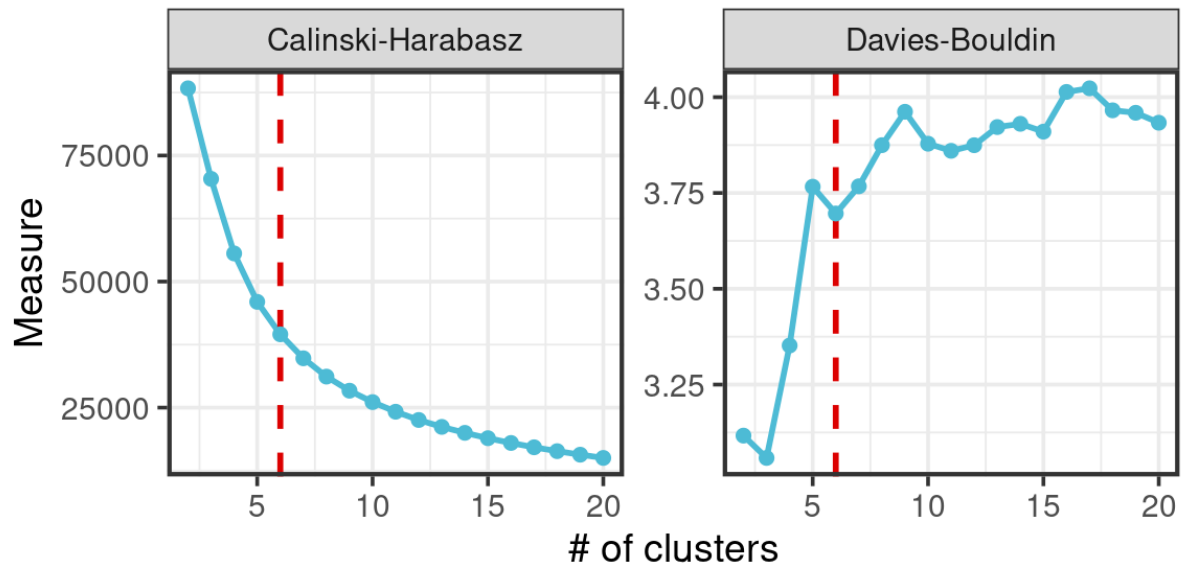

**Supplementary Figure S5.** Ideal number of clusters according to Calinski-Harabasz and Davies-Bouldin methods.

## References

1. Chyl, K., Fraga-González, G., Brem, S. & Jednoróg, K. Brain dynamics of (a)typical reading development—a review of longitudinal studies. *npj Sci. Learn.* **6**, 4 (2021).
2. Erb, J., Henry, M. J., Eisner, F. & Obleser, J. The Brain Dynamics of Rapid Perceptual Adaptation to Adverse Listening Conditions. *Journal of Neuroscience* **33**, 10688–10697 (2013).
3. Calhoun, V. D., Miller, R., Pearlson, G. & Adalı, T. The Chronnectome: Time-Varying Connectivity Networks as the Next Frontier in fMRI Data Discovery. *Neuron* **84**, 262–274 (2014).
4. Hutchison, R. M. *et al.* Dynamic functional connectivity: Promise, issues, and interpretations. *NeuroImage* **80**, 360–378 (2013).
5. Tagliazucchi, E. & Laufs, H. Decoding Wakefulness Levels from Typical fMRI Resting-State Data Reveals Reliable Drifts between Wakefulness and Sleep. *Neuron* **82**, 695–708 (2014).
6. Hellyer, P. J., Scott, G., Shanahan, M., Sharp, D. J. & Leech, R. Cognitive Flexibility through Metastable Neural Dynamics Is Disrupted by Damage to the Structural Connectome. *Journal of Neuroscience* **35**, 9050–9063 (2015).
7. Engels, G., Vlaar, A., McCoy, B., Scherder, E. & Douw, L. Dynamic Functional Connectivity and Symptoms of Parkinson’s Disease: A Resting-State fMRI Study. *Frontiers in Aging Neuroscience* **10**, 388 (2018).
8. Wang, L. *et al.* Dynamic functional reorganization of the motor execution network after stroke. *Brain* **133**, 1224–1238 (2010).
9. Sakoğlu, Ü. *et al.* A method for evaluating dynamic functional network connectivity and task-modulation: Application to schizophrenia. *Magnetic Resonance Materials in Physics, Biology and Medicine* **23**, 351–366 (2010).
10. de Lacy, N. & Calhoun, V. D. Dynamic connectivity and the effects of maturation in youth with attention deficit hyperactivity disorder. *Network Neuroscience* **3**, 195–216 (2019).

11. Watanabe, T. & Rees, G. Brain network dynamics in high-functioning individuals with autism. *Nature Communications* **8**, 16048 (2017).
12. Doria, V. *et al.* Emergence of resting state networks in the preterm human brain. *Proceedings of the National Academy of Sciences* **107**, 20015–20020 (2010).
13. Fransson, P. *et al.* Resting-state networks in the infant brain. *Proc. Natl. Acad. Sci. U.S.A.* **104**, 15531–15536 (2007).
14. Fransson, P. *et al.* Spontaneous Brain Activity in the Newborn Brain During Natural Sleep—An fMRI Study in Infants Born at Full Term. *Pediatr Res* **66**, 301–305 (2009).
15. Eyre, M. *et al.* The Developing Human Connectome Project: typical and disrupted perinatal functional connectivity. *Brain* **144**, 2199–2213 (2021).
16. Gao, W. *et al.* Functional Network Development During the First Year: Relative Sequence and Socioeconomic Correlations. *Cereb. Cortex* **25**, 2919–2928 (2015).
17. Gao, W., Alcauter, S., Smith, J. K., Gilmore, J. H. & Lin, W. Development of human brain cortical network architecture during infancy. *Brain Struct Funct* **220**, 1173–1186 (2015).
18. Boardman, J. P. & Counsell, S. J. Invited Review: Factors associated with atypical brain development in preterm infants: insights from magnetic resonance imaging. *Neuropathol Appl Neurobiol* **46**, 413–421 (2020).
19. Edwards, A. D. *et al.* The Developing Human Connectome Project Neonatal Data Release. *Front. Neurosci.* **16**, 886772 (2022).
20. Kuramoto, Y. *Chemical Oscillations, Waves, and Turbulence*. vol. 19 (Springer Berlin Heidelberg, 1984).
21. Deco, G., Kringelbach, M. L., Jirsa, V. K. & Ritter, P. The dynamics of resting fluctuations in the brain: metastability and its dynamical cortical core. *Sci Rep* **7**, 3095 (2017).
22. Wildie, M. & Shanahan, M. Metastability and chimera states in modular delay and pulse-coupled oscillator networks. *Chaos* **22**, 043131 (2012).

23. Hellyer, P. J. *et al.* The Control of Global Brain Dynamics: Opposing Actions of Frontoparietal Control and Default Mode Networks on Attention. *Journal of Neuroscience* **34**, 451–461 (2014).
24. Cabral, J. *et al.* Cognitive performance in healthy older adults relates to spontaneous switching between states of functional connectivity during rest. *Scientific Reports* **7**, 5135 (2017).
25. Lord, L.-D. *et al.* Dynamical exploration of the repertoire of brain networks at rest is modulated by psilocybin. *NeuroImage* **199**, 127–142 (2019).
26. Bayley, N. Bayley scales of infant and toddler development—Third Edition: Technical manual. (2006).
27. Allison, C. *et al.* The Q-CHAT (Quantitative CHECKlist for Autism in Toddlers): A Normally Distributed Quantitative Measure of Autistic Traits at 18–24 Months of Age: Preliminary Report. *J Autism Dev Disord* **38**, 1414–1425 (2008).
28. Shi, F. *et al.* Infant brain atlases from neonates to 1- and 2-year-olds. *PLoS ONE* **6**, (2011).
29. Glerean, E., Salmi, J., Lahnakoski, J. M., Jääskeläinen, I. P. & Sams, M. Functional Magnetic Resonance Imaging Phase Synchronization as a Measure of Dynamic Functional Connectivity. *Brain Connectivity* **2**, 91–101 (2012).
30. Tooley, U. A., Bassett, D. S. & Mackey, A. P. Environmental influences on the pace of brain development. *Nat Rev Neurosci* **22**, 372–384 (2021).
31. Padilla, N. *et al.* Breakdown of Whole-brain Dynamics in Preterm-born Children. *Cerebral Cortex* **30**, 1159–1170 (2020).
32. Rogers, C. E., Lean, R. E., Wheelock, M. D. & Smyser, C. D. Aberrant structural and functional connectivity and neurodevelopmental impairment in preterm children. *J Neurodevel Disord* **10**, 38 (2018).
33. Ment, L. R., Hirtz, D. & Hüppi, P. S. Imaging biomarkers of outcome in the developing preterm brain. *The Lancet Neurology* **8**, 1042–1055 (2009).
34. Ball, G. *et al.* Machine-learning to characterise neonatal functional connectivity in the preterm brain. *NeuroImage* **124**, 267–275 (2016).

35. Batalle, D. *et al.* Early development of structural networks and the impact of prematurity on brain connectivity. *NeuroImage* **149**, 379–392 (2017).
36. Fisci-Gomez, E. *et al.* Brain network characterization of high-risk preterm-born school-age children. *NeuroImage: Clinical* **11**, 195–209 (2016).
37. Nosarti, C. *et al.* Preterm birth and structural brain alterations in early adulthood. *NeuroImage: Clinical* **6**, 180–191 (2014).
38. Karolis, V. R. *et al.* Reinforcement of the Brain’s Rich-Club Architecture Following Early Neurodevelopmental Disruption Caused by Very Preterm Birth. *Cereb. Cortex* **26**, 1322–1335 (2016).
39. Allison, C. *et al.* Quantitative Checklist for Autism in Toddlers (Q-CHAT). A population screening study with follow-up: the case for multiple time-point screening for autism. *bmjpo* **5**, e000700 (2021).
40. Smyser, C. D. *et al.* Longitudinal Analysis of Neural Network Development in Preterm Infants. *Cerebral Cortex* **20**, 2852–2862 (2010).
41. Ma, X., Wu, X. & Shi, Y. Changes of Dynamic Functional Connectivity Associated With Maturity in Late Preterm Infants. *Front. Pediatr.* **8**, 412 (2020).
42. Wen, X. *et al.* Development of Dynamic Functional Architecture during Early Infancy. *Cerebral Cortex* **30**, 5626–5638 (2020).
43. Tokariev, A. *et al.* Large-scale brain modes reorganize between infant sleep states and carry prognostic information for preterms. *Nat Commun* **10**, 2619 (2019).
44. Tau, G. Z. & Peterson, B. S. Normal Development of Brain Circuits. *Neuropsychopharmacology* **35**, 147–168 (2010).
45. Damaraju, E. *et al.* Functional connectivity in the developing brain: A longitudinal study from 4 to 9 months of age. *NeuroImage* **84**, 169–180 (2014).
46. Cao, M. *et al.* Early Development of Functional Network Segregation Revealed by Connectomic Analysis of the Preterm Human Brain. *Cerebral cortex* **27**, 1949–1963 (2017).

47. Dall’Orso, S. *et al.* Development of functional organization within the sensorimotor network across the perinatal period. *Human Brain Mapping* **43**, 2249–2261 (2022).
48. Allievi, A. G. *et al.* Maturation of Sensori-Motor Functional Responses in the Preterm Brain. *Cerebral Cortex* **26**, 402–413 (2016).
49. Dall’Orso, S. *et al.* Somatotopic Mapping of the Developing Sensorimotor Cortex in the Preterm Human Brain. *Cerebral Cortex* **28**, 2507–2515 (2018).
50. Buckner, R. L., Andrews-Hanna, J. R. & Schacter, D. L. The Brain’s Default Network Anatomy, Function, and Relevance to Disease. *Annals of the New York Academy of Sciences* **1124**, 1–38 (2008).
51. Culham, J. C., Cavina-Pratesi, C. & Singhal, A. The role of parietal cortex in visuomotor control: What have we learned from neuroimaging? *Neuropsychologia* **44**, 2668–2684 (2006).
52. Joseph, R. M. *et al.* Prevalence and associated features of autism spectrum disorder in extremely low gestational age newborns at age 10 years: Prevalence of ASD among ELGANs. *Autism Research* **10**, 224–232 (2017).
53. Leviton, A. *et al.* The risk of neurodevelopmental disorders at age 10 years associated with blood concentrations of interleukins 4 and 10 during the first postnatal month of children born extremely preterm. *Cytokine* **110**, 181–188 (2018).
54. Limperopoulos, C. *et al.* Positive Screening for Autism in Ex-preterm Infants: Prevalence and Risk Factors. *Pediatrics* **121**, 758–765 (2008).
55. Raybaud, C., Ahmad, T., Rastegar, N., Shroff, M. & Al Nassar, M. The premature brain: Developmental and lesional anatomy. *Neuroradiology* **55**, 23–40 (2013).
56. Schieve, L. A. *et al.* Population impact of preterm birth and low birth weight on developmental disabilities in US children. *Annals of Epidemiology* **26**, 267–274 (2016).
57. Agrawal, S., Rao, S. C., Bulsara, M. K. & Patole, S. K. Prevalence of Autism Spectrum Disorder in Preterm Infants: A Meta-analysis. *Pediatrics* **142**, e20180134 (2018).

58. Brydges, C. R. *et al.* Cognitive outcomes in children and adolescents born very preterm: a meta-analysis. *Dev Med Child Neurol* **60**, 452–468 (2018).
59. Kroll, J. *et al.* Real-Life Impact of Executive Function Impairments in Adults Who Were Born Very Preterm. *J Int Neuropsychol Soc* **23**, 381–389 (2017).
60. Esfahlani, F. Z. *et al.* Edge-centric analysis of time-varying functional brain networks with applications in autism spectrum disorder. *NeuroImage* **263**, 119591 (2022).
61. Rogers, S. J. & Ozonoff, S. Annotation: What do we know about sensory dysfunction in autism? A critical review of the empirical evidence. *J Child Psychol & Psychiat* **46**, 1255–1268 (2005).
62. Kolesnik, A. *et al.* Increased cortical reactivity to repeated tones at 8 months in infants with later ASD. *Transl Psychiatry* **9**, 46 (2019).
63. Tomchek, S. D. & Dunn, W. Sensory Processing in Children With and Without Autism: A Comparative Study Using the Short Sensory Profile. *The American Journal of Occupational Therapy* **61**, 190–200 (2007).
64. American Psychiatric Association. *Diagnostic and Statistical Manual of Mental Disorders*. (American Psychiatric Association, 2013). doi:10.1176/appi.books.9780890425596.
65. Ciarrusta, J. *et al.* Emerging functional connectivity differences in newborn infants vulnerable to autism spectrum disorders. *Transl Psychiatry* **10**, 131 (2020).
66. Martineau, J., Andersson, F., Barthélémy, C., Cottier, J.-P. & Destrieux, C. Atypical activation of the mirror neuron system during perception of hand motion in autism. *Brain Research* **1320**, 168–175 (2010).
67. Puts, N. A. J. *et al.* Reduced GABA and altered somatosensory function in children with autism spectrum disorder: Abnormal GABA and touch in ASD. *Autism Research* **10**, 608–619 (2017).
68. Huang, Q. *et al.* GABA<sub>B</sub> receptor modulation of visual sensory processing in adults with and without autism spectrum disorder. *Sci. Transl. Med.* **14**, eabg7859 (2022).
69. Fitzgibbon, S. P. *et al.* The developing Human Connectome Project (dHCP) automated resting-state functional processing framework for newborn infants. *NeuroImage* **223**, 117303 (2020).



70. Leonardi, N. & Van De Ville, D. On spurious and real fluctuations of dynamic functional connectivity during rest. *NeuroImage* **104**, 430–436 (2015).
71. Preti, M. G., Bolton, T. A. & Van De Ville, D. The dynamic functional connectome: State-of-the-art and perspectives. *NeuroImage* **160**, 41–54 (2017).
72. Savva, A. D., Mitsis, G. D. & Matsopoulos, G. K. Assessment of dynamic functional connectivity in resting-state fMRI using the sliding window technique. *Brain and Behavior* **9**, e01255 (2019).
73. Smith, S. M. *et al.* Functional connectomics from resting-state fMRI. *Trends in Cognitive Sciences* **17**, 666–682 (2013).
74. Sala-Llonch, R., Smith, S. M., Woolrich, M. & Duff, E. P. Spatial parcellations, spectral filtering, and connectivity measures in fMRI: Optimizing for discrimination. *Hum Brain Mapp* **40**, 407–419 (2019).
75. Glasser, M. F. *et al.* A multi-modal parcellation of human cerebral cortex. *Nature* **536**, 171–178 (2016).
76. To, T. *et al.* Risk Markers for Poor Developmental Attainment in Young Children: Results From a Longitudinal National Survey. *Arch Pediatr Adolesc Med* **158**, 643 (2004).
77. Deave, T., Heron, J., Evans, J. & Emond, A. The impact of maternal depression in pregnancy on early child development. *BJOG: An International Journal of Obstetrics & Gynaecology* **115**, 1043–1051 (2008).
78. Rice, F. *et al.* The links between prenatal stress and offspring development and psychopathology: disentangling environmental and inherited influences. *Psychol. Med.* **40**, 335–345 (2010).
79. Leonard, H. *et al.* Autism and Intellectual Disability Are Differentially Related to Sociodemographic Background at Birth. *PLoS ONE* **6**, e17875 (2011).
80. Gale-Grant, O. *et al.* Parental age effects on neonatal white matter development. *NeuroImage: Clinical* **27**, 102283 (2020).

81. Gale-Grant, O. *et al.* Clinical, socio-demographic, and parental correlates of early autism traits. *bioRxiv* 2022.09.26.508121 (2022) doi:10.1101/2022.09.26.508121.
82. Abel, G. A., Barclay, M. E. & Payne, R. A. Adjusted indices of multiple deprivation to enable comparisons within and between constituent countries of the UK including an illustration using mortality rates. *BMJ Open* **6**, e012750 (2016).
83. Hughes, E. J. *et al.* A dedicated neonatal brain imaging system. *Magnetic Resonance in Medicine* **78**, 794–804 (2017).
84. Andersson, J. L. R., Skare, S. & Ashburner, J. How to correct susceptibility distortions in spin-echo echo-planar images: application to diffusion tensor imaging. *NeuroImage* **20**, 870–888 (2003).
85. Andersson, J. L. R. & Sotiropoulos, S. N. An integrated approach to correction for off-resonance effects and subject movement in diffusion MR imaging. *NeuroImage* **125**, 1063–1078 (2016).
86. Griffanti, L. *et al.* ICA-based artefact removal and accelerated fMRI acquisition for improved resting state network imaging. *NeuroImage* **95**, 232–247 (2014).
87. Power, J. D., Barnes, K. A., Snyder, A. Z., Schlaggar, B. L. & Petersen, S. E. Spurious but systematic correlations in functional connectivity MRI networks arise from subject motion. *NeuroImage* **59**, 2142–2154 (2012).
88. Makropoulos, A. *et al.* Automatic Whole Brain MRI Segmentation of the Developing Neonatal Brain. *IEEE Trans. Med. Imaging* **33**, 1818–1831 (2014).
89. Tzourio-Mazoyer, N. *et al.* Automated Anatomical Labeling of Activations in SPM Using a Macroscopic Anatomical Parcellation of the MNI MRI Single-Subject Brain. *NeuroImage* **15**, 273–289 (2002).
90. Schuh, A. *et al.* Unbiased construction of a temporally consistent morphological atlas of neonatal brain development. <http://biorxiv.org/lookup/doi/10.1101/251512> (2018) doi:10.1101/251512.
91. Avants, B. B. *et al.* A reproducible evaluation of ANTs similarity metric performance in brain image registration. *NeuroImage* **54**, 2033–2044 (2011).

92. Boashash, B. Estimating and interpreting the instantaneous frequency of a signal. I. Fundamentals. *Proc. IEEE* **80**, 520–538 (1992).
93. Newman, M. E. J. Modularity and community structure in networks. *Proceedings of the National Academy of Sciences* **103**, 8577–8582 (2006).
94. Kuznetsova, A., Brockhoff, P. B. & Christensen, R. H. B. **ImerTest** Package: Tests in Linear Mixed Effects Models. *J. Stat. Soft.* **82**, (2017).
95. Benjamini, Y. & Hochberg, Y. Controlling the False Discovery Rate: A Practical and Powerful Approach to Multiple Testing. *Journal of the Royal Statistical Society: Series B (Methodological)* **57**, 289–300 (1995).
